# Supplementary material for: Immune priming of orthoflavivirus infected-Aedes aegypti mosquitoes against yellow fever virus
Source: Research Square preprint supplement (doi:10.21203/rs.3.rs-8531015/v1), 2026-02-10
Supplement: Supplementary file 1 [file 1e0853a90bd2424445eaf135.pdf]

**A****Mono-infection**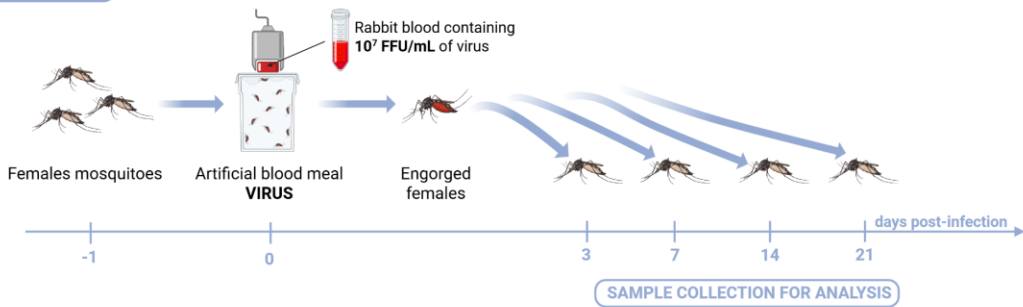**B****Co-infection**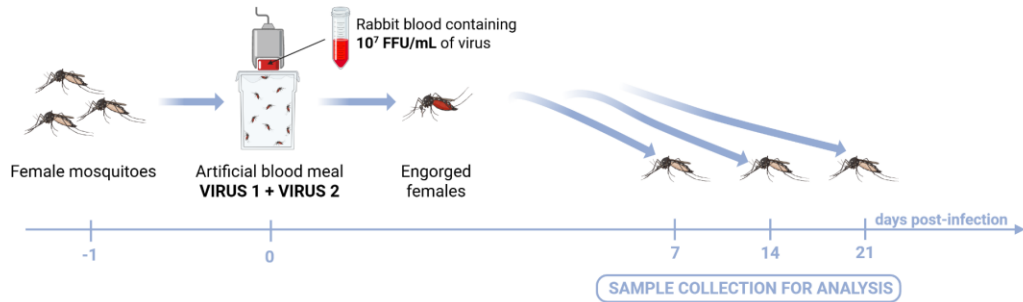**C****Super-infection**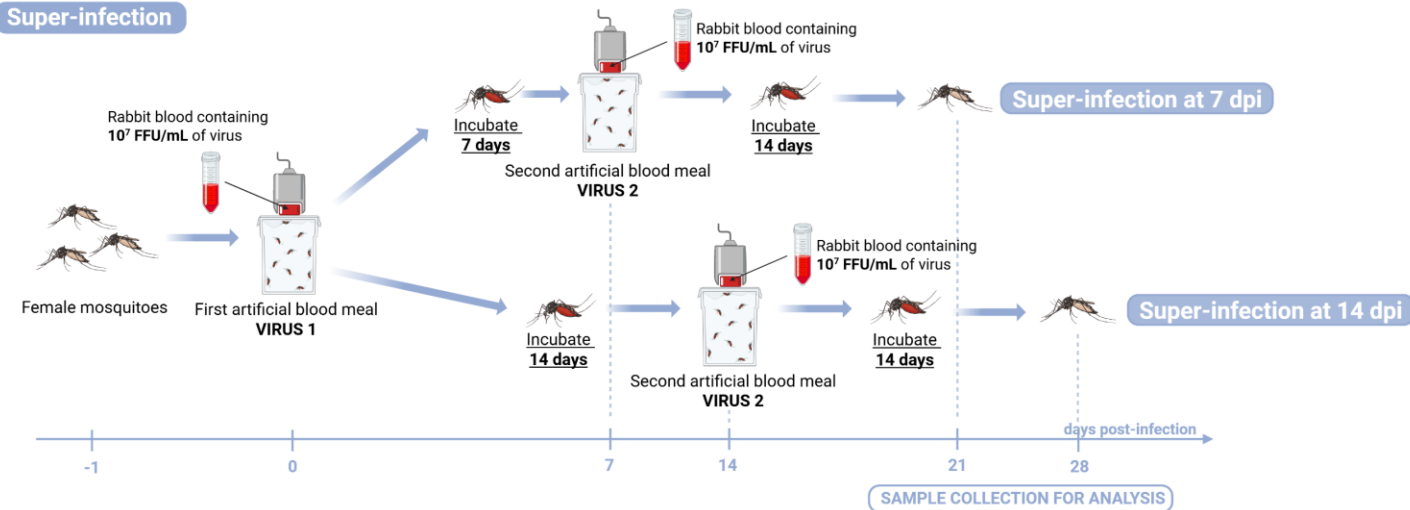

**Figure S1. Experimental design of mono-, co- and super-infection of *Ae. aegypti* mosquitoes.** **A.** Mono-infection of *Ae. aegypti* mosquitoes. Female mosquitoes were exposed to a blood meal containing a single virus (YFV, JEV or DENV) provided at a final titer of  $10^7$  FFU/mL. Blood-fed females were collected for analysis at 3, 7, 14, and 21 days post-infection (dpi). **B.** Co-infection of *Ae. aegypti* mosquitoes. Female mosquitoes were exposed to two viruses provided at a final titer of  $10^7$  FFU/mL and blood-fed females were collected for analysis at 7, 14, and 21 dpi. **C.** Super-infection of *Ae. aegypti* mosquitoes. Female mosquitoes were primo-infected via blood meal with one virus and, at 7 or 14 days later, exposed to a blood meal containing a second virus. Double blood-fed mosquitoes were then collected for analysis at 14 days post super-infection. Figure created using BioRender.

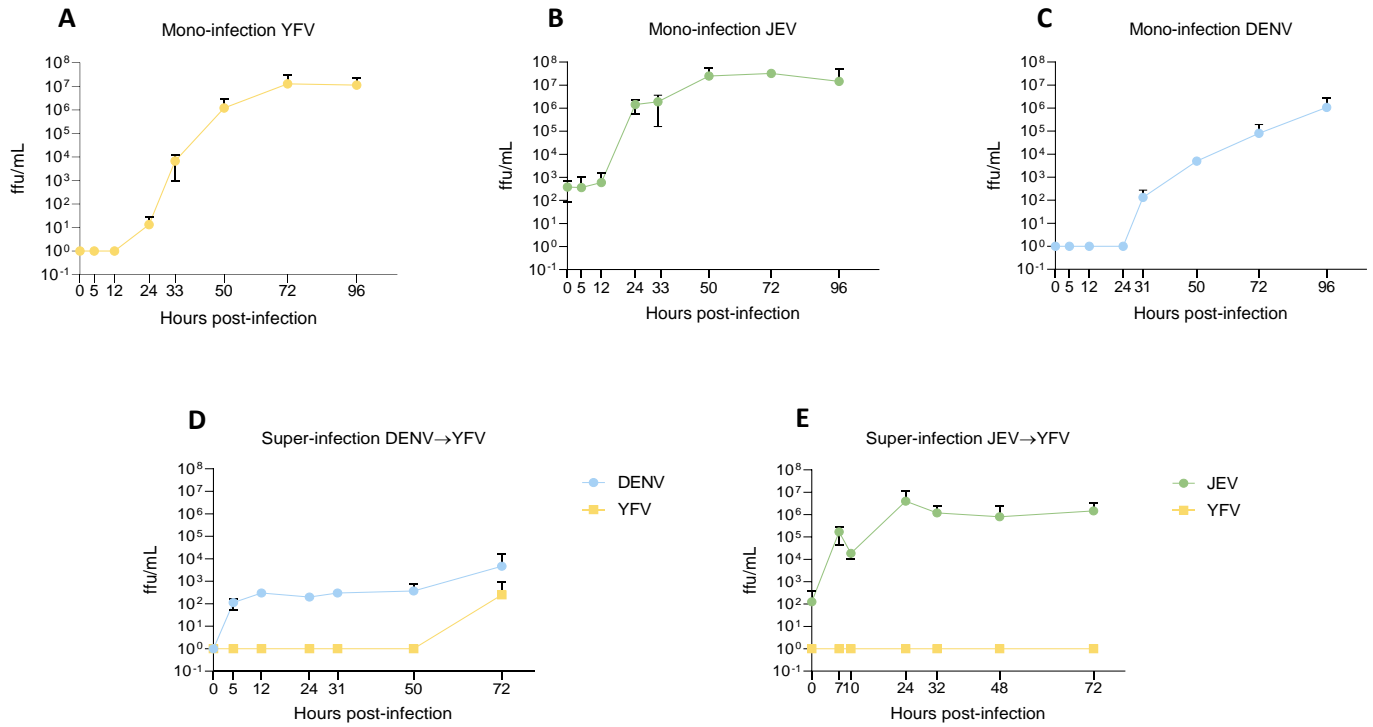

**Figure S2. Replication kinetics of viruses in *Ae. aegypti* Aag2 cells.** A-C. Mono-infection of YFV (A), JEV (B), and DENV (C). D-E. Super-infection of YFV 24 hours following a primo-infection of DENV (D) and JEV (E). In D and E, the 0 hour post infection time point corresponds to 0 hour post super-infection, i.e, 24 hours post primo-infection). Each experiment was performed in triplicate. Viral titers are expressed in FFU/mL at different hours post-infection.

| Target | GenBank  | Name               | Primers/Probe | Sequence 5' → 3'                          |
|--------|----------|--------------------|---------------|-------------------------------------------|
| Actin  | U20287.1 | beta-actin forward | Forward       | GCTACGTCGCCCTGGACTT                       |
|        |          | beta-actin reverse | Reverse       | AGGAACGACGGCTGGAAGA                       |
|        |          | beta-actin Probe   | Probe         | (TxRed)AGGAAATGGCCACCGCTGCCTCGT(BHQ2)     |
| JEV    | KF907505 | JEV-4132F          | Forward       | GCTTAGCGCTCACATCCACT                      |
|        |          | JEV-4219R          | Reverse       | CACCCTCTCTTCTTGTGGG                       |
|        |          | JEV-4197P          | Probe         | (Hex)TGCAGACCATTAGTCCGGCAGCTATAGT(BHQ1)   |
| YFV    | MK060080 | 625F-YFV           | Forward       | CTGTCCCAATCTCAGTCCAAG                     |
|        |          | 694R-YFV           | Reverse       | AACGTTTTCCACCCCATAGC                      |
|        |          | 646P-YFV           | Probe         | (6FAM)AGAGGAGCCAGATGACATTGATTGCTGGT(BHQ1) |
| DENV   | MK268692 | Deng_2_F           | Forward       | AGAAGAGAAGAGGAAGAGGCA                     |
|        |          | Deng_2_R           | Reverse       | TGGCTGACTTCTTTTAACGTC                     |
|        |          | Deng_2_P           | Probe         | (Cyanine5)CTTGACGGGGCTCACAGGTAGC(BHQ3)    |
| CHIKV  | HE806461 | CHIK Asia F        | Forward       | TGATCAAATGACCGGCATCCT                     |
|        |          | CHIK Asia R        | Reverse       | CGTTGCGTTCTGCCGTTAAC                      |
|        |          | CHIKV-ASIA_P       | Probe         | (6FAM)TGCTACAGAAGTCACGCCGGAGGAT(BHQ1)     |

**Table S1. List of probes and primers used for qPCR.** JEV: Japanese encephalitis virus, YFV: Yellow fever virus, DENV: dengue virus, CHIKV: chikungunya virus.

| Immune pathway | Gene   | VectorBase Gene ID | Name         | Primers/Probe | Sequence                                         |
|----------------|--------|--------------------|--------------|---------------|--------------------------------------------------|
| Toll           | Rel1   | AAEL007696         | AAE_Rel1_F   | Forward       | GCTATCAAAACGGAACCTAGAG                           |
|                |        |                    | AAE_Rel1_R   | Reverse       | GGTGGTGTGGCCGTAAAGTG                             |
|                |        |                    | AAE_Rel1_P   | Probe         | (HEX)CGACGCACCCGTTTAACTTCATTGGAAACTA(BHG1)       |
|                | Cactus | AAEL000709         | AAE_Cactus_F | Forward       | GCGCTGCATTGTGAAATGG                              |
|                |        |                    | AAE_Cactus_R | Reverse       | CGTTTTGAATGTCCAGCCAGG                            |
|                |        |                    | AAE_Cactus_P | Probe         | (Cyanine5)TACTTCCACCAGAACGACGACGGTGAT(BHQ3)      |
| JAK-STAT       | STAT   | AAEL020559         | AAE_STAT_F   | Forward       | ACTACCTGGCGGAATGGATC                             |
|                |        |                    | AAE_STAT_R   | Reverse       | CGTTGATTAGCTGGTTGAGGAA                           |
|                |        |                    | AAE_STAT_P   | Probe         | (Cyanine5)CTAAACGTCCCAGTCTACCAGCACGAA(BHQ3)      |
|                | PIAS   | AAEL026694         | AAE_PIAS_F   | Forward       | TTCTTCGACTACAGCTCCTTC                            |
|                |        |                    | AAE_PIAS_R   | Reverse       | GCACGGGTACTGTTTTCGCG                             |
|                |        |                    | AAE_PIAS_P   | Probe         | (FAM)CTCAGCGATTCCGATGATGATCTCCCTTT(BHQ1)         |
| IMD            | IMD    | AAEL010083         | AAE_IMD_F    | Forward       | CTCGGAAGGAGAAATAGAAGC                            |
|                |        |                    | AAE_IMD_R    | Reverse       | CAGGTTGACCATTTTGCCGAG                            |
|                |        |                    | AAE_IMD_P    | Probe         | (Cyanine5)ATACGTTATCGGAGCGAATCTATCAGTTCATT(BHQ3) |
|                | Caspar | AAEL027860         | AAE_Caspar_F | Forward       | ACCGGAGAAGGCTTCATGAG                             |
|                |        |                    | AAE_Caspar_R | Reverse       | GAGCAAGTTACCCTCCGGT                              |
|                |        |                    | AAE_Caspar_P | Probe         | (FAM)CAAAATAGGCAAACTACACGCTGCACATCAA(BHQ1)       |
| RNAi           | Dicer2 | AAEL006794         | AAE_Dicer2_F | Forward       | CTTTCCCAAATCCGGAGTACG                            |
|                |        |                    | AAE_Dicer2_R | Reverse       | GAGAAACTGATCTGGCTTAACC                           |
|                |        |                    | AAE_Dicer2_P | Probe         | (HEX)CCTACGCGAATTATTTAGCCAAGCTTACCA(BHQ1)        |
|                | Ago2   | AAEL017251         | AAE_Ago2_F   | Forward       | TTCAGTGTCTGGACATAGTGC                            |
|                |        |                    | AAE_Ago2_R   | Reverse       | CCGACTGGAACAGACCGTA                              |
|                |        |                    | AAE_Ago2_P   | Probe         | (FAM)CGGACCGCGTACGAAAATAATCCTAGATTTA(BHQ1)       |
| Reporter gene  |        |                    |              |               |                                                  |
|                | Rps17  | XM_001648517       | AAE_Rps17_F  | Forward       | TCGAAGAAGTGGCCATCATTC                            |
|                |        |                    | AAE_Rps17_R  | Reverse       | TCTCTGCGCTCACGTTCTCT                             |
|                |        |                    | AAE_Rps17_P  | Probe         | (Txrd) CCCCTGCGAACAAGATCGCTGGTTT (BHQ2)          |

Table S2. List of probes and primers targeting immune genes for quantitative PCR.
