# Supplementary material for: Immune priming of orthoflavivirus infected-Aedes aegypti mosquitoes against yellow fever virus
Source: Research Square preprint supplement (doi:10.21203/rs.3.rs-8531015/v1), 2026-02-10
Supplement: Supplementary file 1 [file 7d1f64ed9813e1b4351abc0a.xlsx]

## Sheet: SI DENV --> YFV
virus1	day_pi	coef1	coef2	contrast	estimate	SE	df	t.ratio	p.value	infection_type	virus2	day_inoc_virus2	gene	pathway	day_pi_ref	estimate_ref	SE_ref	ΔΔCt	IC95 low	IC95 hight	Fold-change
DENV	7	Infected	None	Infected - None	0.233025	0.549273	1321	0.424243	0.905576	super	YFV	7	Ago2	siRNA	14	0.0190075	0.286564	0.214018	-1.42422	1.85226	1.15991
DENV	14	Infected	None	Infected - None	-0.940673	0.549273	1321	-1.71258	0.200806	super	YFV	14	Ago2	siRNA	14	0.0190075	0.286564	-0.959681	-2.59792	0.678559	0.514171
DENV	7	Infected	None	Infected - None	-0.343404	0.549273	1321	-0.625197	0.806311	super	YFV	7	Cactus	Toll	14	-0.280676	0.286564	-0.0627275	-1.70097	1.57551	0.957452
DENV	14	Infected	None	Infected - None	-0.864458	0.549273	1321	-1.57382	0.25736	super	YFV	14	Cactus	Toll	14	-0.280676	0.286564	-0.583782	-2.22202	1.05446	0.667213
DENV	7	Infected	None	Infected - None	-1.55489	0.549273	1321	-2.83081	0.0130755	super	YFV	7	Caspar	IMD	14	-0.445183	0.286564	-1.1097	-2.74794	0.528536	0.463389
DENV	14	Infected	None	Infected - None	-1.11231	0.549273	1321	-2.02506	0.106609	super	YFV	14	Caspar	IMD	14	-0.445183	0.286564	-0.667125	-2.30536	0.971115	0.629761
DENV	7	Infected	None	Infected - None	-0.417946	0.549273	1321	-0.760908	0.727061	super	YFV	7	Dicer2	siRNA	14	0.337935	0.286564	-0.755881	-2.39412	0.882359	0.592185
DENV	14	Infected	None	Infected - None	-1.10301	0.549273	1321	-2.00812	0.11062	super	YFV	14	Dicer2	siRNA	14	0.337935	0.286564	-1.44094	-3.07918	0.197297	0.368327
DENV	7	Infected	None	Infected - None	-1.21496	0.549273	1321	-2.21194	0.0695297	super	YFV	7	IMD	IMD	14	0.380142	0.453097	-1.5951	-3.55974	0.369546	0.330999
DENV	14	Infected	None	Infected - None	-1.0058	0.549273	1321	-1.83115	0.159839	super	YFV	14	IMD	IMD	14	0.380142	0.453097	-1.38594	-3.35059	0.578705	0.38264
DENV	7	Infected	None	Infected - None	-0.706388	0.549273	1321	-1.28604	0.40329	super	YFV	7	PIAS	Jak-Stat	14	-0.582369	0.286564	-0.124019	-1.76226	1.51422	0.917628
DENV	14	Infected	None	Infected - None	-0.702244	0.549273	1321	-1.2785	0.40758	super	YFV	14	PIAS	Jak-Stat	14	-0.582369	0.286564	-0.119875	-1.75811	1.51836	0.920267
DENV	7	Infected	None	Infected - None	-0.373677	0.549273	1321	-0.680312	0.775016	super	YFV	7	Rel1	Toll	14	-0.273915	0.453097	-0.0997623	-2.06441	1.86488	0.933187
DENV	14	Infected	None	Infected - None	-0.974575	0.549273	1321	-1.7743	0.178647	super	YFV	14	Rel1	Toll	14	-0.273915	0.453097	-0.700661	-2.66531	1.26398	0.61529
DENV	7	Infected	None	Infected - None	-1.23808	0.549273	1321	-2.25403	0.0628341	super	YFV	7	STAT	Jak-Stat	14	0.330422	0.286564	-1.5685	-3.20674	0.0697403	0.337159
DENV	14	Infected	None	Infected - None	-1.55509	0.549273	1321	-2.83118	0.013061	super	YFV	14	STAT	Jak-Stat	14	0.330422	0.286564	-1.88551	-3.52375	-0.247271	0.270648

## Sheet: SI JEV --> YFV
virus1	day_pi	coef1	coef2	contrast	estimate	SE	df	t.ratio	p.value	infection_type	virus2	day_inoc_virus2	gene	pathway	day_pi_ref	estimate_ref	SE_ref	ΔΔCt	IC95 low	IC95 hight	Fold change
JEV	7	Infected	None	Infected - None	1.76001	0.521086	1321	3.37758	0.00217103	super	YFV	7	Ago2	siRNA	14	0.0190075	0.286564	1.741	0.158007	3.32399	3.34267
JEV	14	Infected	None	Infected - None	3.05444	0.582592	1321	5.24284	5.50645e-07	super	YFV	14	Ago2	siRNA	14	0.0190075	0.286564	3.03543	1.33188	4.73897	8.19889
JEV	7	Infected	None	Infected - None	1.53535	0.521086	1321	2.94644	0.00916777	super	YFV	7	Cactus	Toll	14	-0.280676	0.286564	1.81602	0.233028	3.39902	3.52109
JEV	14	Infected	None	Infected - None	1.97914	0.582592	1321	3.39713	0.00202497	super	YFV	14	Cactus	Toll	14	-0.280676	0.286564	2.25982	0.556271	3.96336	4.7893
JEV	7	Infected	None	Infected - None	1.67472	0.521086	1321	3.2139	0.00383275	super	YFV	7	Caspar	IMD	14	-0.445183	0.286564	2.1199	0.536908	3.70289	4.34664
JEV	14	Infected	None	Infected - None	2.06993	0.582592	1321	3.55298	0.00114702	super	YFV	14	Caspar	IMD	14	-0.445183	0.286564	2.51512	0.811572	4.21866	5.71644
JEV	7	Infected	None	Infected - None	1.94076	0.521086	1321	3.72445	0.00059731	super	YFV	7	Dicer2	siRNA	14	0.337935	0.286564	1.60282	0.0198283	3.18582	3.03737
JEV	14	Infected	None	Infected - None	2.65553	0.582592	1321	4.55813	1.68018e-05	super	YFV	14	Dicer2	siRNA	14	0.337935	0.286564	2.3176	0.614052	4.02114	4.98501
JEV	7	Infected	None	Infected - None	-1.81479	0.524178	1321	-3.46216	0.00160198	super	YFV	7	IMD	IMD	14	0.380142	0.453097	-2.19493	-4.11039	-0.279471	0.218404
JEV	14	Infected	None	Infected - None	-3.19861	0.582592	1321	-5.49032	1.43986e-07	super	YFV	14	IMD	IMD	14	0.380142	0.453097	-3.57876	-5.60871	-1.5488	0.0836926
JEV	7	Infected	None	Infected - None	1.63421	0.521086	1321	3.13617	0.00497443	super	YFV	7	PIAS	Jak-Stat	14	-0.582369	0.286564	2.21658	0.633589	3.79958	4.64791
JEV	14	Infected	None	Infected - None	1.78279	0.582592	1321	3.0601	0.00638352	super	YFV	14	PIAS	Jak-Stat	14	-0.582369	0.286564	2.36516	0.661611	4.0687	5.15208
JEV	7	Infected	None	Infected - None	2.50957	0.521086	1321	4.81603	4.87859e-06	super	YFV	7	Rel1	Toll	14	-0.273915	0.453097	2.78348	0.874082	4.69288	6.88512
JEV	14	Infected	None	Infected - None	0.108887	0.582592	1321	0.1869	0.980927	super	YFV	14	Rel1	Toll	14	-0.273915	0.453097	0.382801	-1.64715	2.41275	1.30387
JEV	7	Infected	None	Infected - None	3.95028	0.521086	1321	7.58086	0	super	YFV	7	STAT	Jak-Stat	14	0.330422	0.286564	3.61985	2.03686	5.20285	12.2938
JEV	14	Infected	None	Infected - None	2.66261	0.601698	1321	4.42515	3.10295e-05	super	YFV	14	STAT	Jak-Stat	14	0.330422	0.286564	2.33218	0.591191	4.07318	5.03567

## Sheet: Mono YFV
virus1	day_pi	coef1	coef2	contrast	estimate	SE	df	t.ratio	p.value	infection_type	gene	pathway	ΔΔCt	IC95 low	IC95 hight	Fold change
YFV	3	Infected	None	Infected - None	-0.117543	0.303947	1239	-0.386722	0.920883	mono	Ago2	siRNA	-0.117543	-0.713279	0.478193	0.921756
YFV	3	Infected	None	Infected - None	-0.585093	0.303947	1239	-1.92499	0.132066	mono	Cactus	Toll	-0.585093	-1.18083	0.0106426	0.666606
YFV	3	Infected	None	Infected - None	-0.0547992	0.303947	1239	-0.180292	0.98224	mono	Caspar	IMD	-0.0547992	-0.650535	0.540937	0.962728
YFV	3	Infected	None	Infected - None	0.192264	0.303947	1239	0.632557	0.802216	mono	Dicer2	siRNA	0.192264	-0.403472	0.788	1.14256
YFV	3	Infected	None	Infected - None	-0.280791	0.303947	1239	-0.923817	0.625311	mono	IMD	IMD	-0.280791	-0.876527	0.314945	0.823139
YFV	3	Infected	None	Infected - None	-0.89122	0.303947	1239	-2.93216	0.00959573	mono	PIAS	Jak-Stat	-0.89122	-1.48696	-0.295484	0.539158
YFV	3	Infected	None	Infected - None	-0.439936	0.303947	1239	-1.44741	0.316957	mono	Rel1	Toll	-0.439936	-1.03567	0.1558	0.737167
YFV	3	Infected	None	Infected - None	-0.0387589	0.303947	1239	-0.127519	0.991075	mono	STAT	Jak-Stat	-0.0387589	-0.634495	0.556977	0.973492
YFV	7	Infected	None	Infected - None	-0.533708	0.303947	1239	-1.75592	0.185081	mono	Ago2	siRNA	-0.533708	-1.12944	0.0620284	0.690777
YFV	7	Infected	None	Infected - None	-0.307523	0.303947	1239	-1.01176	0.569546	mono	Cactus	Toll	-0.307523	-0.903259	0.288213	0.808028
YFV	7	Infected	None	Infected - None	-0.173521	0.303947	1239	-0.570894	0.835655	mono	Caspar	IMD	-0.173521	-0.769257	0.422215	0.886676
YFV	7	Infected	None	Infected - None	0.00780933	0.303947	1239	0.0256931	0.999636	mono	Dicer2	siRNA	0.00780933	-0.587927	0.603545	1.00543
YFV	7	Infected	None	Infected - None	-0.572073	0.303947	1239	-1.88215	0.144265	mono	IMD	IMD	-0.572073	-1.16781	0.0236627	0.672649
YFV	7	Infected	None	Infected - None	-0.513995	0.303947	1239	-1.69107	0.208986	mono	PIAS	Jak-Stat	-0.513995	-1.10973	0.0817406	0.70028
YFV	7	Infected	None	Infected - None	0.0930154	0.303947	1239	0.306025	0.949689	mono	Rel1	Toll	0.0930154	-0.502721	0.688751	1.0666
YFV	7	Infected	None	Infected - None	0.109461	0.303947	1239	0.360132	0.931014	mono	STAT	Jak-Stat	0.109461	-0.486275	0.705197	1.07883
YFV	14	Infected	None	Infected - None	0.0190075	0.286564	1239	0.0663289	0.997577	mono	Ago2	siRNA	0.0190075	-0.542658	0.580673	1.01326
YFV	14	Infected	None	Infected - None	-0.280676	0.286564	1239	-0.979454	0.590007	mono	Cactus	Toll	-0.280676	-0.842342	0.280989	0.823205
YFV	14	Infected	None	Infected - None	-0.445183	0.286564	1239	-1.55352	0.266441	mono	Caspar	IMD	-0.445183	-1.00685	0.116482	0.734491
YFV	14	Infected	None	Infected - None	0.337935	0.286564	1239	1.17926	0.465787	mono	Dicer2	siRNA	0.337935	-0.223731	0.8996	1.26395
YFV	14	Infected	None	Infected - None	0.380142	0.453097	1239	0.838984	0.678831	mono	IMD	IMD	0.380142	-0.507929	1.26821	1.30147
YFV	14	Infected	None	Infected - None	-0.582369	0.286564	1239	-2.03225	0.104967	mono	PIAS	Jak-Stat	-0.582369	-1.14403	-0.0207036	0.667866
YFV	14	Infected	None	Infected - None	-0.273915	0.453097	1239	-0.604538	0.817664	mono	Rel1	Toll	-0.273915	-1.16199	0.614156	0.827072
YFV	14	Infected	None	Infected - None	0.330422	0.286564	1239	1.15305	0.481646	mono	STAT	Jak-Stat	0.330422	-0.231243	0.892087	1.25738
YFV	21	Infected	None	Infected - None	1.62618	0.277464	1239	5.86087	1.76768e-08	mono	Ago2	siRNA	1.62618	1.08235	2.17001	3.08695
YFV	21	Infected	None	Infected - None	1.17089	0.277464	1239	4.21997	7.77325e-05	mono	Cactus	Toll	1.17089	0.627062	1.71472	2.25151
YFV	21	Infected	None	Infected - None	1.06	0.277464	1239	3.82033	0.000410842	mono	Caspar	IMD	1.06	0.516175	1.60383	2.08494
YFV	21	Infected	None	Infected - None	1.47378	0.277464	1239	5.31159	3.85459e-07	mono	Dicer2	siRNA	1.47378	0.929946	2.01761	2.77748
YFV	21	Infected	None	Infected - None	1.37554	0.277464	1239	4.95755	2.43045e-06	mono	IMD	IMD	1.37554	0.831713	1.91937	2.59465
YFV	21	Infected	None	Infected - None	0.953711	0.277464	1239	3.43724	0.00175676	mono	PIAS	Jak-Stat	0.953711	0.409881	1.49754	1.93685
YFV	21	Infected	None	Infected - None	1.07811	0.277464	1239	3.88559	0.000316295	mono	Rel1	Toll	1.07811	0.534282	1.62194	2.11127
YFV	21	Infected	None	Infected - None	1.38407	0.277464	1239	4.98829	2.08072e-06	mono	STAT	Jak-Stat	1.38407	0.840243	1.9279	2.61004
