# Supplementary material for: Immune priming of orthoflavivirus infected-Aedes aegypti mosquitoes against yellow fever virus
Source: Research Square preprint supplement (doi:10.21203/rs.3.rs-8531015/v1), 2026-02-10
Supplement: Supplementary file 2 [file dd6743e873c16860bc8a9dea.xlsx]

## Sheet: Data
num	mosquito_num	virus_1	virus_2	day_pi	infection_type	virus_1_infection	virus_1_dissemination	virus_1_transmission	virus_2_infection	virus_2_dissemination	virus_2_transmission
1	1	YFV	0	3	mono	0	0	0	0	0	0
2	2	YFV	0	3	mono	1	0	0	0	0	0
3	3	YFV	0	3	mono	1	0	0	0	0	0
4	4	YFV	0	3	mono	0	0	0	0	0	0
5	5	YFV	0	3	mono	0	0	0	0	0	0
6	6	YFV	0	3	mono	1	0	0	0	0	0
7	7	YFV	0	3	mono	0	0	0	0	0	0
8	8	YFV	0	3	mono	1	0	0	0	0	0
9	9	YFV	0	3	mono	1	0	0	0	0	0
10	10	YFV	0	3	mono	1	0	0	0	0	0
11	11	YFV	0	3	mono	1	0	0	0	0	0
12	12	YFV	0	3	mono	1	0	0	0	0	0
13	13	YFV	0	3	mono	1	0	0	0	0	0
14	14	YFV	0	3	mono	0	0	0	0	0	0
15	15	YFV	0	3	mono	0	0	0	0	0	0
16	16	YFV	0	3	mono	1	0	0	0	0	0
17	17	YFV	0	3	mono	1	0	0	0	0	0
18	18	YFV	0	3	mono	1	0	0	0	0	0
19	19	YFV	0	3	mono	1	0	0	0	0	0
20	20	YFV	0	3	mono	0	0	0	0	0	0
21	21	YFV	0	3	mono	0	0	0	0	0	0
22	22	YFV	0	3	mono	1	0	0	0	0	0
23	23	YFV	0	3	mono	1	0	0	0	0	0
24	24	YFV	0	3	mono	0	0	0	0	0	0
25	25	YFV	0	3	mono	1	0	0	0	0	0
26	26	YFV	0	3	mono	1	0	0	0	0	0
27	27	YFV	0	3	mono	1	0	0	0	0	0
28	28	YFV	0	3	mono	1	0	0	0	0	0
29	29	YFV	0	3	mono	1	1	0	0	0	0
30	30	YFV	0	3	mono	1	0	0	0	0	0
31	31	YFV	0	3	mono	0	0	0	0	0	0
32	32	YFV	0	3	mono	1	0	0	0	0	0
33	33	YFV	0	3	mono	1	0	0	0	0	0
34	34	YFV	0	3	mono	1	0	0	0	0	0
35	35	YFV	0	3	mono	1	0	0	0	0	0
36	36	YFV	0	3	mono	1	0	0	0	0	0
37	37	YFV	0	3	mono	1	0	0	0	0	0
38	38	YFV	0	3	mono	1	0	0	0	0	0
39	39	YFV	0	3	mono	1	0	0	0	0	0
40	40	YFV	0	3	mono	1	0	0	0	0	0
41	41	YFV	0	3	mono	1	0	0	0	0	0
42	42	YFV	0	3	mono	1	0	0	0	0	0
43	43	YFV	0	3	mono	1	0	0	0	0	0
44	44	YFV	0	3	mono	1	0	0	0	0	0
45	45	YFV	0	3	mono	1	0	0	0	0	0
46	46	YFV	0	3	mono	1	0	0	0	0	0
47	47	YFV	0	3	mono	1	0	0	0	0	0
48	48	YFV	0	3	mono	0	0	0	0	0	0
49	1	YFV	0	7	mono	0	0	0	0	0	0
50	2	YFV	0	7	mono	0	0	0	0	0	0
51	3	YFV	0	7	mono	1	0	0	0	0	0
52	4	YFV	0	7	mono	0	0	0	0	0	0
53	5	YFV	0	7	mono	0	0	0	0	0	0
54	6	YFV	0	7	mono	1	0	0	0	0	0
55	7	YFV	0	7	mono	0	0	0	0	0	0
56	8	YFV	0	7	mono	0	0	0	0	0	0
57	9	YFV	0	7	mono	1	0	0	0	0	0
58	10	YFV	0	7	mono	1	0	0	0	0	0
59	11	YFV	0	7	mono	1	0	0	0	0	0
60	12	YFV	0	7	mono	1	0	0	0	0	0
61	13	YFV	0	7	mono	1	0	0	0	0	0
62	14	YFV	0	7	mono	0	0	0	0	0	0
63	15	YFV	0	7	mono	1	0	0	0	0	0
64	16	YFV	0	7	mono	1	0	0	0	0	0
65	17	YFV	0	7	mono	0	0	0	0	0	0
66	18	YFV	0	7	mono	0	0	0	0	0	0
67	19	YFV	0	7	mono	1	1	0	0	0	0
68	20	YFV	0	7	mono	1	0	0	0	0	0
69	21	YFV	0	7	mono	1	1	0	0	0	0
70	22	YFV	0	7	mono	1	0	0	0	0	0
71	23	YFV	0	7	mono	1	0	0	0	0	0
72	24	YFV	0	7	mono	1	0	0	0	0	0
73	25	YFV	0	7	mono	1	1	0	0	0	0
74	26	YFV	0	7	mono	1	0	0	0	0	0
75	27	YFV	0	7	mono	1	1	0	0	0	0
76	28	YFV	0	7	mono	1	1	0	0	0	0
77	29	YFV	0	7	mono	1	0	0	0	0	0
78	30	YFV	0	7	mono	1	1	0	0	0	0
79	31	YFV	0	7	mono	1	0	0	0	0	0
80	32	YFV	0	7	mono	1	0	0	0	0	0
81	33	YFV	0	7	mono	1	0	0	0	0	0
82	34	YFV	0	7	mono	1	1	0	0	0	0
83	35	YFV	0	7	mono	1	1	0	0	0	0
84	36	YFV	0	7	mono	1	0	0	0	0	0
85	37	YFV	0	7	mono	1	0	0	0	0	0
86	38	YFV	0	7	mono	1	0	0	0	0	0
87	39	YFV	0	7	mono	1	1	0	0	0	0
88	40	YFV	0	7	mono	1	0	0	0	0	0
89	41	YFV	0	7	mono	1	1	0	0	0	0
90	42	YFV	0	7	mono	1	0	0	0	0	0
91	43	YFV	0	7	mono	1	0	0	0	0	0
92	44	YFV	0	7	mono	1	1	0	0	0	0
93	45	YFV	0	7	mono	1	1	1	0	0	0
94	46	YFV	0	7	mono	1	0	0	0	0	0
95	47	YFV	0	7	mono	1	1	0	0	0	0
96	48	YFV	0	7	mono	1	1	1	0	0	0
97	1	YFV	0	14	mono	1	0	0	0	0	0
98	2	YFV	0	14	mono	0	0	0	0	0	0
99	3	YFV	0	14	mono	0	0	0	0	0	0
100	4	YFV	0	14	mono	1	0	0	0	0	0
101	5	YFV	0	14	mono	1	1	0	0	0	0
102	6	YFV	0	14	mono	1	1	0	0	0	0
103	7	YFV	0	14	mono	1	0	0	0	0	0
104	8	YFV	0	14	mono	1	0	0	0	0	0
105	9	YFV	0	14	mono	1	1	0	0	0	0
106	10	YFV	0	14	mono	1	0	0	0	0	0
107	11	YFV	0	14	mono	0	0	0	0	0	0
108	12	YFV	0	14	mono	1	0	0	0	0	0
109	13	YFV	0	14	mono	1	1	0	0	0	0
110	14	YFV	0	14	mono	1	0	0	0	0	0
111	15	YFV	0	14	mono	1	1	0	0	0	0
112	16	YFV	0	14	mono	1	1	0	0	0	0
113	17	YFV	0	14	mono	1	0	0	0	0	0
114	18	YFV	0	14	mono	1	0	0	0	0	0
115	19	YFV	0	14	mono	1	1	0	0	0	0
116	20	YFV	0	14	mono	0	0	0	0	0	0
117	21	YFV	0	14	mono	1	1	0	0	0	0
118	22	YFV	0	14	mono	1	1	0	0	0	0
119	23	YFV	0	14	mono	1	0	0	0	0	0
120	24	YFV	0	14	mono	1	1	0	0	0	0
121	25	YFV	0	14	mono	1	0	0	0	0	0
122	26	YFV	0	14	mono	1	1	0	0	0	0
123	27	YFV	0	14	mono	1	1	0	0	0	0
124	28	YFV	0	14	mono	1	1	0	0	0	0
125	29	YFV	0	14	mono	1	1	0	0	0	0
126	30	YFV	0	14	mono	1	1	1	0	0	0
127	31	YFV	0	14	mono	1	1	0	0	0	0
128	32	YFV	0	14	mono	1	1	0	0	0	0
129	33	YFV	0	14	mono	1	1	0	0	0	0
130	34	YFV	0	14	mono	1	1	1	0	0	0
131	35	YFV	0	14	mono	1	1	0	0	0	0
132	36	YFV	0	14	mono	1	1	1	0	0	0
133	37	YFV	0	14	mono	1	1	1	0	0	0
134	38	YFV	0	14	mono	1	1	0	0	0	0
135	39	YFV	0	14	mono	1	1	1	0	0	0
136	40	YFV	0	14	mono	1	1	0	0	0	0
137	41	YFV	0	14	mono	1	1	1	0	0	0
138	42	YFV	0	14	mono	1	1	1	0	0	0
139	43	YFV	0	14	mono	1	1	1	0	0	0
140	44	YFV	0	14	mono	1	1	0	0	0	0
141	45	YFV	0	14	mono	1	0	0	0	0	0
142	46	YFV	0	14	mono	1	0	0	0	0	0
143	1	YFV	0	21	mono	0	0	0	0	0	0
144	2	YFV	0	21	mono	1	1	1	0	0	0
145	3	YFV	0	21	mono	1	0	0	0	0	0
146	4	YFV	0	21	mono	1	1	1	0	0	0
147	5	YFV	0	21	mono	1	1	0	0	0	0
148	6	YFV	0	21	mono	1	0	0	0	0	0
149	7	YFV	0	21	mono	1	1	0	0	0	0
150	8	YFV	0	21	mono	1	0	0	0	0	0
151	9	YFV	0	21	mono	1	1	0	0	0	0
152	10	YFV	0	21	mono	0	0	0	0	0	0
153	11	YFV	0	21	mono	1	0	0	0	0	0
154	12	YFV	0	21	mono	0	0	0	0	0	0
155	13	YFV	0	21	mono	1	1	0	0	0	0
156	14	YFV	0	21	mono	1	0	0	0	0	0
157	15	YFV	0	21	mono	1	1	1	0	0	0
158	16	YFV	0	21	mono	1	1	1	0	0	0
159	17	YFV	0	21	mono	1	1	1	0	0	0
160	18	YFV	0	21	mono	1	0	0	0	0	0
161	19	YFV	0	21	mono	1	1	0	0	0	0
162	20	YFV	0	21	mono	1	0	0	0	0	0
163	21	YFV	0	21	mono	1	1	0	0	0	0
164	22	YFV	0	21	mono	1	1	1	0	0	0
165	23	YFV	0	21	mono	1	1	1	0	0	0
166	24	YFV	0	21	mono	1	1	0	0	0	0
167	25	YFV	0	21	mono	1	1	1	0	0	0
168	26	YFV	0	21	mono	1	1	0	0	0	0
169	27	YFV	0	21	mono	1	1	0	0	0	0
170	28	YFV	0	21	mono	1	1	1	0	0	0
171	29	YFV	0	21	mono	1	1	0	0	0	0
172	30	YFV	0	21	mono	1	1	1	0	0	0
173	31	YFV	0	21	mono	1	1	1	0	0	0
174	1	JEV	0	3	mono	1	1	0	0	0	0
175	2	JEV	0	3	mono	1	0	0	0	0	0
176	3	JEV	0	3	mono	1	0	0	0	0	0
177	4	JEV	0	3	mono	1	0	0	0	0	0
178	5	JEV	0	3	mono	1	0	0	0	0	0
179	6	JEV	0	3	mono	1	0	0	0	0	0
180	7	JEV	0	3	mono	1	0	0	0	0	0
181	8	JEV	0	3	mono	1	0	0	0	0	0
182	9	JEV	0	3	mono	1	0	0	0	0	0
183	10	JEV	0	3	mono	1	0	0	0	0	0
184	11	JEV	0	3	mono	1	0	0	0	0	0
185	12	JEV	0	3	mono	1	1	0	0	0	0
186	13	JEV	0	3	mono	1	1	0	0	0	0
187	14	JEV	0	3	mono	1	0	0	0	0	0
188	15	JEV	0	3	mono	1	0	0	0	0	0
189	16	JEV	0	3	mono	1	0	0	0	0	0
190	17	JEV	0	3	mono	1	0	0	0	0	0
191	18	JEV	0	3	mono	1	0	0	0	0	0
192	19	JEV	0	3	mono	1	1	0	0	0	0
193	20	JEV	0	3	mono	1	0	0	0	0	0
194	21	JEV	0	3	mono	1	0	0	0	0	0
195	22	JEV	0	3	mono	1	0	0	0	0	0
196	23	JEV	0	3	mono	1	0	0	0	0	0
197	24	JEV	0	3	mono	1	0	0	0	0	0
198	25	JEV	0	3	mono	1	0	0	0	0	0
199	26	JEV	0	3	mono	1	0	0	0	0	0
200	27	JEV	0	3	mono	1	0	0	0	0	0
201	28	JEV	0	3	mono	1	0	0	0	0	0
202	29	JEV	0	3	mono	1	0	0	0	0	0
203	30	JEV	0	3	mono	1	0	0	0	0	0
204	31	JEV	0	3	mono	1	0	0	0	0	0
205	32	JEV	0	3	mono	0	0	0	0	0	0
206	33	JEV	0	3	mono	1	0	0	0	0	0
207	34	JEV	0	3	mono	0	0	0	0	0	0
208	35	JEV	0	3	mono	1	0	0	0	0	0
209	36	JEV	0	3	mono	1	0	0	0	0	0
210	37	JEV	0	3	mono	1	0	0	0	0	0
211	38	JEV	0	3	mono	1	1	0	0	0	0
212	39	JEV	0	3	mono	1	0	0	0	0	0
213	40	JEV	0	3	mono	1	0	0	0	0	0
214	41	JEV	0	3	mono	1	1	0	0	0	0
215	42	JEV	0	3	mono	1	0	0	0	0	0
216	43	JEV	0	3	mono	1	0	0	0	0	0
217	44	JEV	0	3	mono	1	1	0	0	0	0
218	45	JEV	0	3	mono	1	0	0	0	0	0
219	46	JEV	0	3	mono	1	0	0	0	0	0
220	47	JEV	0	3	mono	1	1	0	0	0	0
221	48	JEV	0	3	mono	1	0	0	0	0	0
222	1	JEV	0	7	mono	1	1	0	0	0	0
223	2	JEV	0	7	mono	1	1	0	0	0	0
224	3	JEV	0	7	mono	1	1	0	0	0	0
225	4	JEV	0	7	mono	1	1	0	0	0	0
226	5	JEV	0	7	mono	1	1	1	0	0	0
227	6	JEV	0	7	mono	1	1	1	0	0	0
228	7	JEV	0	7	mono	1	1	1	0	0	0
229	8	JEV	0	7	mono	1	1	0	0	0	0
230	9	JEV	0	7	mono	1	1	0	0	0	0
231	10	JEV	0	7	mono	1	0	0	0	0	0
232	11	JEV	0	7	mono	1	1	0	0	0	0
233	12	JEV	0	7	mono	1	1	0	0	0	0
234	13	JEV	0	7	mono	1	1	1	0	0	0
235	14	JEV	0	7	mono	1	1	1	0	0	0
236	15	JEV	0	7	mono	1	1	0	0	0	0
237	16	JEV	0	7	mono	1	1	0	0	0	0
238	17	JEV	0	7	mono	1	1	1	0	0	0
239	18	JEV	0	7	mono	1	1	1	0	0	0
240	19	JEV	0	7	mono	1	1	0	0	0	0
241	20	JEV	0	7	mono	1	0	0	0	0	0
242	21	JEV	0	7	mono	1	0	0	0	0	0
243	22	JEV	0	7	mono	1	0	0	0	0	0
244	23	JEV	0	7	mono	1	0	0	0	0	0
245	24	JEV	0	7	mono	1	1	1	0	0	0
246	25	JEV	0	7	mono	1	1	1	0	0	0
247	26	JEV	0	7	mono	1	1	1	0	0	0
248	27	JEV	0	7	mono	1	1	0	0	0	0
249	28	JEV	0	7	mono	1	1	0	0	0	0
250	29	JEV	0	7	mono	1	1	0	0	0	0
251	30	JEV	0	7	mono	1	1	0	0	0	0
252	31	JEV	0	7	mono	1	1	0	0	0	0
253	32	JEV	0	7	mono	1	0	0	0	0	0
254	33	JEV	0	7	mono	1	1	0	0	0	0
255	34	JEV	0	7	mono	1	1	0	0	0	0
256	35	JEV	0	7	mono	1	1	1	0	0	0
257	36	JEV	0	7	mono	1	1	1	0	0	0
258	37	JEV	0	7	mono	1	1	0	0	0	0
259	38	JEV	0	7	mono	1	1	0	0	0	0
260	39	JEV	0	7	mono	1	1	0	0	0	0
261	40	JEV	0	7	mono	1	1	0	0	0	0
262	41	JEV	0	7	mono	1	1	0	0	0	0
263	42	JEV	0	7	mono	1	1	0	0	0	0
264	43	JEV	0	7	mono	1	1	0	0	0	0
265	44	JEV	0	7	mono	1	1	0	0	0	0
266	45	JEV	0	7	mono	1	1	0	0	0	0
267	46	JEV	0	7	mono	1	1	1	0	0	0
268	47	JEV	0	7	mono	0	0	0	0	0	0
269	1	JEV	0	14	mono	1	1	1	0	0	0
270	2	JEV	0	14	mono	1	1	1	0	0	0
271	3	JEV	0	14	mono	1	1	1	0	0	0
272	4	JEV	0	14	mono	1	1	1	0	0	0
273	5	JEV	0	14	mono	1	1	1	0	0	0
274	6	JEV	0	14	mono	1	1	1	0	0	0
275	7	JEV	0	14	mono	1	1	0	0	0	0
276	8	JEV	0	14	mono	1	1	1	0	0	0
277	9	JEV	0	14	mono	1	1	1	0	0	0
278	10	JEV	0	14	mono	1	1	1	0	0	0
279	11	JEV	0	14	mono	1	1	0	0	0	0
280	12	JEV	0	14	mono	1	1	1	0	0	0
281	13	JEV	0	14	mono	1	1	1	0	0	0
282	14	JEV	0	14	mono	1	1	1	0	0	0
283	15	JEV	0	14	mono	1	1	1	0	0	0
284	16	JEV	0	14	mono	1	1	1	0	0	0
285	17	JEV	0	14	mono	1	1	1	0	0	0
286	18	JEV	0	14	mono	1	1	1	0	0	0
287	19	JEV	0	14	mono	1	1	1	0	0	0
288	20	JEV	0	14	mono	1	1	1	0	0	0
289	21	JEV	0	14	mono	1	1	1	0	0	0
290	22	JEV	0	14	mono	1	1	0	0	0	0
291	23	JEV	0	14	mono	1	1	1	0	0	0
292	24	JEV	0	14	mono	1	1	1	0	0	0
293	25	JEV	0	14	mono	1	1	1	0	0	0
294	26	JEV	0	14	mono	1	1	0	0	0	0
295	27	JEV	0	14	mono	1	1	1	0	0	0
296	28	JEV	0	14	mono	1	1	0	0	0	0
297	29	JEV	0	14	mono	1	1	1	0	0	0
298	30	JEV	0	14	mono	1	1	1	0	0	0
299	31	JEV	0	14	mono	1	1	1	0	0	0
300	32	JEV	0	14	mono	1	1	1	0	0	0
301	33	JEV	0	14	mono	1	1	0	0	0	0
302	34	JEV	0	14	mono	1	1	1	0	0	0
303	35	JEV	0	14	mono	1	1	1	0	0	0
304	36	JEV	0	14	mono	0	0	0	0	0	0
305	37	JEV	0	14	mono	1	1	1	0	0	0
306	38	JEV	0	14	mono	0	0	0	0	0	0
307	39	JEV	0	14	mono	0	0	0	0	0	0
308	40	JEV	0	14	mono	1	1	0	0	0	0
309	41	JEV	0	14	mono	1	1	0	0	0	0
310	42	JEV	0	14	mono	1	1	1	0	0	0
311	43	JEV	0	14	mono	1	1	0	0	0	0
312	44	JEV	0	14	mono	1	1	1	0	0	0
313	45	JEV	0	14	mono	1	1	0	0	0	0
314	46	JEV	0	14	mono	1	1	0	0	0	0
315	47	JEV	0	14	mono	1	1	0	0	0	0
316	48	JEV	0	14	mono	1	1	0	0	0	0
317	1	JEV	0	21	mono	1	1	0	0	0	0
318	2	JEV	0	21	mono	1	1	0	0	0	0
319	3	JEV	0	21	mono	1	1	1	0	0	0
320	4	JEV	0	21	mono	1	1	0	0	0	0
321	5	JEV	0	21	mono	1	1	0	0	0	0
322	6	JEV	0	21	mono	0	0	0	0	0	0
323	7	JEV	0	21	mono	1	1	0	0	0	0
324	8	JEV	0	21	mono	1	1	0	0	0	0
325	9	JEV	0	21	mono	1	1	0	0	0	0
326	10	JEV	0	21	mono	1	1	0	0	0	0
327	11	JEV	0	21	mono	1	1	0	0	0	0
328	12	JEV	0	21	mono	1	1	1	0	0	0
329	13	JEV	0	21	mono	1	1	0	0	0	0
330	14	JEV	0	21	mono	1	1	0	0	0	0
331	15	JEV	0	21	mono	1	1	0	0	0	0
332	16	JEV	0	21	mono	1	1	0	0	0	0
333	17	JEV	0	21	mono	1	0	0	0	0	0
334	18	JEV	0	21	mono	1	1	1	0	0	0
335	19	JEV	0	21	mono	1	1	1	0	0	0
336	20	JEV	0	21	mono	1	1	0	0	0	0
337	21	JEV	0	21	mono	1	1	0	0	0	0
338	22	JEV	0	21	mono	1	1	0	0	0	0
339	23	JEV	0	21	mono	1	1	0	0	0	0
340	24	JEV	0	21	mono	1	1	1	0	0	0
341	25	JEV	0	21	mono	1	1	0	0	0	0
342	26	JEV	0	21	mono	1	1	0	0	0	0
343	27	JEV	0	21	mono	1	1	1	0	0	0
344	28	JEV	0	21	mono	1	1	0	0	0	0
345	29	JEV	0	21	mono	1	1	1	0	0	0
346	30	JEV	0	21	mono	0	0	0	0	0	0
347	31	JEV	0	21	mono	1	1	0	0	0	0
348	32	JEV	0	21	mono	1	1	0	0	0	0
349	33	JEV	0	21	mono	1	1	0	0	0	0
350	34	JEV	0	21	mono	1	1	1	0	0	0
351	35	JEV	0	21	mono	1	1	0	0	0	0
352	36	JEV	0	21	mono	1	1	0	0	0	0
353	37	JEV	0	21	mono	1	1	0	0	0	0
354	38	JEV	0	21	mono	1	1	0	0	0	0
355	39	JEV	0	21	mono	1	1	0	0	0	0
356	40	JEV	0	21	mono	1	1	0	0	0	0
357	41	JEV	0	21	mono	1	1	0	0	0	0
358	42	JEV	0	21	mono	1	1	1	0	0	0
359	43	JEV	0	21	mono	1	1	0	0	0	0
360	44	JEV	0	21	mono	1	1	1	0	0	0
361	45	JEV	0	21	mono	1	1	0	0	0	0
362	46	JEV	0	21	mono	1	1	0	0	0	0
363	47	JEV	0	21	mono	1	1	1	0	0	0
364	48	JEV	0	21	mono	1	1	0	0	0	0
365	1	DENV	0	3	mono	1	0	0	0	0	0
366	2	DENV	0	3	mono	1	0	0	0	0	0
367	3	DENV	0	3	mono	1	0	0	0	0	0
368	4	DENV	0	3	mono	1	0	0	0	0	0
369	5	DENV	0	3	mono	1	0	0	0	0	0
370	6	DENV	0	3	mono	1	0	0	0	0	0
371	7	DENV	0	3	mono	0	0	0	0	0	0
372	8	DENV	0	3	mono	1	0	0	0	0	0
373	9	DENV	0	3	mono	1	0	0	0	0	0
374	10	DENV	0	3	mono	0	0	0	0	0	0
375	11	DENV	0	3	mono	1	0	0	0	0	0
376	12	DENV	0	3	mono	1	0	0	0	0	0
377	13	DENV	0	3	mono	1	0	0	0	0	0
378	14	DENV	0	3	mono	1	0	0	0	0	0
379	15	DENV	0	3	mono	1	0	0	0	0	0
380	16	DENV	0	3	mono	1	0	0	0	0	0
381	17	DENV	0	3	mono	0	0	0	0	0	0
382	18	DENV	0	3	mono	0	0	0	0	0	0
383	19	DENV	0	3	mono	1	0	0	0	0	0
384	20	DENV	0	3	mono	1	0	0	0	0	0
385	21	DENV	0	3	mono	1	0	0	0	0	0
386	22	DENV	0	3	mono	1	0	0	0	0	0
387	23	DENV	0	3	mono	1	0	0	0	0	0
388	24	DENV	0	3	mono	0	0	0	0	0	0
389	25	DENV	0	3	mono	0	0	0	0	0	0
390	26	DENV	0	3	mono	1	0	0	0	0	0
391	27	DENV	0	3	mono	1	0	0	0	0	0
392	28	DENV	0	3	mono	0	0	0	0	0	0
393	29	DENV	0	3	mono	1	0	0	0	0	0
394	30	DENV	0	3	mono	1	0	0	0	0	0
395	31	DENV	0	3	mono	1	0	0	0	0	0
396	32	DENV	0	3	mono	1	0	0	0	0	0
397	33	DENV	0	3	mono	1	0	0	0	0	0
398	34	DENV	0	3	mono	1	0	0	0	0	0
399	35	DENV	0	3	mono	1	0	0	0	0	0
400	36	DENV	0	3	mono	1	1	0	0	0	0
401	37	DENV	0	3	mono	1	0	0	0	0	0
402	38	DENV	0	3	mono	1	0	0	0	0	0
403	39	DENV	0	3	mono	1	0	0	0	0	0
404	40	DENV	0	3	mono	1	0	0	0	0	0
405	41	DENV	0	3	mono	1	0	0	0	0	0
406	42	DENV	0	3	mono	1	0	0	0	0	0
407	43	DENV	0	3	mono	1	0	0	0	0	0
408	44	DENV	0	3	mono	1	0	0	0	0	0
409	45	DENV	0	3	mono	0	0	0	0	0	0
410	46	DENV	0	3	mono	1	0	0	0	0	0
411	47	DENV	0	3	mono	1	0	0	0	0	0
412	48	DENV	0	3	mono	1	0	0	0	0	0
413	1	DENV	0	7	mono	1	0	0	0	0	0
414	2	DENV	0	7	mono	1	1	0	0	0	0
415	3	DENV	0	7	mono	1	1	0	0	0	0
416	4	DENV	0	7	mono	1	1	0	0	0	0
417	5	DENV	0	7	mono	1	1	0	0	0	0
418	6	DENV	0	7	mono	1	0	0	0	0	0
419	7	DENV	0	7	mono	1	1	0	0	0	0
420	8	DENV	0	7	mono	0	0	0	0	0	0
421	9	DENV	0	7	mono	1	0	0	0	0	0
422	10	DENV	0	7	mono	1	0	0	0	0	0
423	11	DENV	0	7	mono	1	0	0	0	0	0
424	12	DENV	0	7	mono	1	0	0	0	0	0
425	13	DENV	0	7	mono	1	0	0	0	0	0
426	14	DENV	0	7	mono	1	0	0	0	0	0
427	15	DENV	0	7	mono	1	1	0	0	0	0
428	16	DENV	0	7	mono	1	1	0	0	0	0
429	17	DENV	0	7	mono	1	1	0	0	0	0
430	18	DENV	0	7	mono	1	1	0	0	0	0
431	19	DENV	0	7	mono	1	1	0	0	0	0
432	20	DENV	0	7	mono	1	1	0	0	0	0
433	21	DENV	0	7	mono	1	1	0	0	0	0
434	22	DENV	0	7	mono	1	0	0	0	0	0
435	23	DENV	0	7	mono	1	0	0	0	0	0
436	24	DENV	0	7	mono	1	0	0	0	0	0
437	25	DENV	0	7	mono	1	1	0	0	0	0
438	26	DENV	0	7	mono	1	1	0	0	0	0
439	27	DENV	0	7	mono	1	1	0	0	0	0
440	28	DENV	0	7	mono	1	1	0	0	0	0
441	29	DENV	0	7	mono	0	0	0	0	0	0
442	30	DENV	0	7	mono	1	1	0	0	0	0
443	31	DENV	0	7	mono	1	1	0	0	0	0
444	32	DENV	0	7	mono	1	1	0	0	0	0
445	33	DENV	0	7	mono	1	1	0	0	0	0
446	34	DENV	0	7	mono	1	0	0	0	0	0
447	35	DENV	0	7	mono	1	0	0	0	0	0
448	36	DENV	0	7	mono	1	1	0	0	0	0
449	37	DENV	0	7	mono	1	0	0	0	0	0
450	38	DENV	0	7	mono	1	1	0	0	0	0
451	39	DENV	0	7	mono	1	0	0	0	0	0
452	40	DENV	0	7	mono	1	1	0	0	0	0
453	41	DENV	0	7	mono	1	0	0	0	0	0
454	42	DENV	0	7	mono	1	1	0	0	0	0
455	43	DENV	0	7	mono	1	1	0	0	0	0
456	44	DENV	0	7	mono	1	1	0	0	0	0
457	45	DENV	0	7	mono	1	1	0	0	0	0
458	1	DENV	0	14	mono	1	1	0	0	0	0
459	2	DENV	0	14	mono	1	1	0	0	0	0
460	3	DENV	0	14	mono	1	1	1	0	0	0
461	4	DENV	0	14	mono	1	1	0	0	0	0
462	5	DENV	0	14	mono	1	1	0	0	0	0
463	6	DENV	0	14	mono	1	1	0	0	0	0
464	7	DENV	0	14	mono	1	1	1	0	0	0
465	8	DENV	0	14	mono	1	1	0	0	0	0
466	9	DENV	0	14	mono	1	1	1	0	0	0
467	10	DENV	0	14	mono	1	1	0	0	0	0
468	11	DENV	0	14	mono	1	1	1	0	0	0
469	12	DENV	0	14	mono	1	1	0	0	0	0
470	13	DENV	0	14	mono	1	1	1	0	0	0
471	14	DENV	0	14	mono	1	1	0	0	0	0
472	15	DENV	0	14	mono	1	0	0	0	0	0
473	16	DENV	0	14	mono	1	1	0	0	0	0
474	17	DENV	0	14	mono	1	1	1	0	0	0
475	18	DENV	0	14	mono	1	1	0	0	0	0
476	19	DENV	0	14	mono	1	1	1	0	0	0
477	20	DENV	0	14	mono	1	1	0	0	0	0
478	21	DENV	0	14	mono	1	1	0	0	0	0
479	22	DENV	0	14	mono	1	1	0	0	0	0
480	23	DENV	0	14	mono	1	1	0	0	0	0
481	24	DENV	0	14	mono	1	1	1	0	0	0
482	25	DENV	0	14	mono	1	1	0	0	0	0
483	26	DENV	0	14	mono	1	1	1	0	0	0
484	27	DENV	0	14	mono	1	1	0	0	0	0
485	28	DENV	0	14	mono	1	1	1	0	0	0
486	29	DENV	0	14	mono	1	1	0	0	0	0
487	30	DENV	0	14	mono	1	1	0	0	0	0
488	31	DENV	0	14	mono	1	1	0	0	0	0
489	32	DENV	0	14	mono	1	1	0	0	0	0
490	33	DENV	0	14	mono	1	1	0	0	0	0
491	34	DENV	0	14	mono	1	1	0	0	0	0
492	35	DENV	0	14	mono	1	1	0	0	0	0
493	36	DENV	0	14	mono	1	1	1	0	0	0
494	37	DENV	0	14	mono	1	1	0	0	0	0
495	38	DENV	0	14	mono	1	1	0	0	0	0
496	39	DENV	0	14	mono	1	1	0	0	0	0
497	40	DENV	0	14	mono	1	1	0	0	0	0
498	41	DENV	0	14	mono	1	1	0	0	0	0
499	42	DENV	0	14	mono	1	1	0	0	0	0
500	43	DENV	0	14	mono	1	1	0	0	0	0
501	44	DENV	0	14	mono	1	1	1	0	0	0
502	45	DENV	0	14	mono	1	1	0	0	0	0
503	46	DENV	0	14	mono	1	1	0	0	0	0
504	47	DENV	0	14	mono	1	1	0	0	0	0
505	48	DENV	0	14	mono	1	1	0	0	0	0
506	1	DENV	0	21	mono	1	1	1	0	0	0
507	2	DENV	0	21	mono	1	1	0	0	0	0
508	3	DENV	0	21	mono	1	1	1	0	0	0
509	4	DENV	0	21	mono	1	1	0	0	0	0
510	5	DENV	0	21	mono	1	1	0	0	0	0
511	6	DENV	0	21	mono	1	1	0	0	0	0
512	7	DENV	0	21	mono	1	1	0	0	0	0
513	8	DENV	0	21	mono	1	1	1	0	0	0
514	9	DENV	0	21	mono	1	1	0	0	0	0
515	10	DENV	0	21	mono	1	1	0	0	0	0
516	11	DENV	0	21	mono	1	1	1	0	0	0
517	12	DENV	0	21	mono	1	1	0	0	0	0
518	13	DENV	0	21	mono	1	1	1	0	0	0
519	14	DENV	0	21	mono	1	1	0	0	0	0
520	15	DENV	0	21	mono	1	1	1	0	0	0
521	16	DENV	0	21	mono	1	1	1	0	0	0
522	17	DENV	0	21	mono	1	1	0	0	0	0
523	18	DENV	0	21	mono	1	1	0	0	0	0
524	19	DENV	0	21	mono	1	1	0	0	0	0
525	20	DENV	0	21	mono	1	1	1	0	0	0
526	21	DENV	0	21	mono	1	1	1	0	0	0
527	22	DENV	0	21	mono	1	1	0	0	0	0
528	23	DENV	0	21	mono	1	1	0	0	0	0
529	24	DENV	0	21	mono	1	1	1	0	0	0
530	25	DENV	0	21	mono	1	1	0	0	0	0
531	26	DENV	0	21	mono	1	1	0	0	0	0
532	27	DENV	0	21	mono	1	1	0	0	0	0
533	28	DENV	0	21	mono	1	1	1	0	0	0
534	29	DENV	0	21	mono	1	1	0	0	0	0
535	30	DENV	0	21	mono	1	1	1	0	0	0
536	31	DENV	0	21	mono	1	1	1	0	0	0
537	32	DENV	0	21	mono	1	1	0	0	0	0
538	33	DENV	0	21	mono	1	1	0	0	0	0
539	34	DENV	0	21	mono	0	0	0	0	0	0
540	35	DENV	0	21	mono	1	1	0	0	0	0
541	36	DENV	0	21	mono	1	1	0	0	0	0
542	37	DENV	0	21	mono	1	1	0	0	0	0
543	38	DENV	0	21	mono	0	0	0	0	0	0
544	39	DENV	0	21	mono	1	1	0	0	0	0
545	40	DENV	0	21	mono	1	1	0	0	0	0
546	41	DENV	0	21	mono	1	1	0	0	0	0
547	42	DENV	0	21	mono	1	1	0	0	0	0
548	43	DENV	0	21	mono	1	1	0	0	0	0
549	44	DENV	0	21	mono	1	1	0	0	0	0
550	45	DENV	0	21	mono	1	1	0	0	0	0
551	46	DENV	0	21	mono	1	1	1	0	0	0
552	47	DENV	0	21	mono	1	1	0	0	0	0
553	1	CHIKV	0	3	mono	1	1	0	0	0	0
554	2	CHIKV	0	3	mono	1	1	1	0	0	0
555	3	CHIKV	0	3	mono	1	1	0	0	0	0
556	4	CHIKV	0	3	mono	1	1	0	0	0	0
557	5	CHIKV	0	3	mono	1	1	1	0	0	0
558	6	CHIKV	0	3	mono	1	1	0	0	0	0
559	7	CHIKV	0	3	mono	1	1	0	0	0	0
560	8	CHIKV	0	3	mono	1	1	1	0	0	0
561	9	CHIKV	0	3	mono	1	1	0	0	0	0
562	10	CHIKV	0	3	mono	1	1	1	0	0	0
563	11	CHIKV	0	3	mono	1	1	0	0	0	0
564	12	CHIKV	0	3	mono	1	1	1	0	0	0
565	13	CHIKV	0	3	mono	1	1	0	0	0	0
566	14	CHIKV	0	3	mono	1	1	0	0	0	0
567	15	CHIKV	0	3	mono	1	1	0	0	0	0
568	16	CHIKV	0	3	mono	1	1	0	0	0	0
569	17	CHIKV	0	3	mono	1	1	0	0	0	0
570	18	CHIKV	0	3	mono	1	1	1	0	0	0
571	19	CHIKV	0	3	mono	1	1	1	0	0	0
572	20	CHIKV	0	3	mono	1	1	0	0	0	0
573	21	CHIKV	0	3	mono	1	1	1	0	0	0
574	22	CHIKV	0	3	mono	1	1	0	0	0	0
575	23	CHIKV	0	3	mono	1	1	1	0	0	0
576	24	CHIKV	0	3	mono	1	1	1	0	0	0
577	25	CHIKV	0	3	mono	1	1	0	0	0	0
578	26	CHIKV	0	3	mono	1	1	0	0	0	0
579	27	CHIKV	0	3	mono	1	1	0	0	0	0
580	28	CHIKV	0	3	mono	1	1	0	0	0	0
581	29	CHIKV	0	3	mono	1	1	1	0	0	0
582	30	CHIKV	0	3	mono	1	0	0	0	0	0
583	31	CHIKV	0	3	mono	1	1	0	0	0	0
584	32	CHIKV	0	3	mono	1	1	1	0	0	0
585	33	CHIKV	0	3	mono	1	1	0	0	0	0
586	34	CHIKV	0	3	mono	1	0	0	0	0	0
587	35	CHIKV	0	3	mono	1	0	0	0	0	0
588	36	CHIKV	0	3	mono	1	1	0	0	0	0
589	37	CHIKV	0	3	mono	1	0	0	0	0	0
590	38	CHIKV	0	3	mono	1	0	0	0	0	0
591	39	CHIKV	0	3	mono	1	1	0	0	0	0
592	40	CHIKV	0	3	mono	1	1	0	0	0	0
593	41	CHIKV	0	3	mono	1	1	0	0	0	0
594	42	CHIKV	0	3	mono	1	1	0	0	0	0
595	43	CHIKV	0	3	mono	1	0	0	0	0	0
596	44	CHIKV	0	3	mono	1	1	0	0	0	0
597	45	CHIKV	0	3	mono	1	1	0	0	0	0
598	46	CHIKV	0	3	mono	1	1	0	0	0	0
599	47	CHIKV	0	3	mono	1	1	1	0	0	0
600	48	CHIKV	0	3	mono	1	1	0	0	0	0
601	1	CHIKV	0	7	mono	1	1	0	0	0	0
602	2	CHIKV	0	7	mono	1	1	0	0	0	0
603	3	CHIKV	0	7	mono	1	1	1	0	0	0
604	4	CHIKV	0	7	mono	1	1	1	0	0	0
605	5	CHIKV	0	7	mono	1	1	0	0	0	0
606	6	CHIKV	0	7	mono	1	1	1	0	0	0
607	7	CHIKV	0	7	mono	1	1	0	0	0	0
608	8	CHIKV	0	7	mono	1	1	1	0	0	0
609	9	CHIKV	0	7	mono	1	1	0	0	0	0
610	10	CHIKV	0	7	mono	1	1	1	0	0	0
611	11	CHIKV	0	7	mono	1	1	1	0	0	0
612	12	CHIKV	0	7	mono	1	1	0	0	0	0
613	13	CHIKV	0	7	mono	1	1	1	0	0	0
614	14	CHIKV	0	7	mono	1	1	1	0	0	0
615	15	CHIKV	0	7	mono	1	1	1	0	0	0
616	16	CHIKV	0	7	mono	1	1	0	0	0	0
617	17	CHIKV	0	7	mono	1	1	1	0	0	0
618	18	CHIKV	0	7	mono	1	1	0	0	0	0
619	19	CHIKV	0	7	mono	1	1	1	0	0	0
620	20	CHIKV	0	7	mono	1	1	1	0	0	0
621	21	CHIKV	0	7	mono	1	1	1	0	0	0
622	22	CHIKV	0	7	mono	1	1	1	0	0	0
623	23	CHIKV	0	7	mono	1	1	1	0	0	0
624	24	CHIKV	0	7	mono	1	1	0	0	0	0
625	25	CHIKV	0	7	mono	1	1	0	0	0	0
626	26	CHIKV	0	7	mono	1	1	0	0	0	0
627	27	CHIKV	0	7	mono	1	1	0	0	0	0
628	28	CHIKV	0	7	mono	1	1	1	0	0	0
629	29	CHIKV	0	7	mono	1	1	0	0	0	0
630	30	CHIKV	0	7	mono	1	1	0	0	0	0
631	31	CHIKV	0	7	mono	1	1	1	0	0	0
632	32	CHIKV	0	7	mono	1	1	1	0	0	0
633	33	CHIKV	0	7	mono	1	1	0	0	0	0
634	34	CHIKV	0	7	mono	1	1	0	0	0	0
635	35	CHIKV	0	7	mono	1	1	0	0	0	0
636	36	CHIKV	0	7	mono	1	1	1	0	0	0
637	37	CHIKV	0	7	mono	1	1	1	0	0	0
638	38	CHIKV	0	7	mono	1	1	0	0	0	0
639	39	CHIKV	0	7	mono	1	1	1	0	0	0
640	40	CHIKV	0	7	mono	1	1	1	0	0	0
641	41	CHIKV	0	7	mono	1	1	1	0	0	0
642	42	CHIKV	0	7	mono	1	1	1	0	0	0
643	43	CHIKV	0	7	mono	1	1	1	0	0	0
644	44	CHIKV	0	7	mono	1	1	1	0	0	0
645	45	CHIKV	0	7	mono	1	1	1	0	0	0
646	46	CHIKV	0	7	mono	1	1	0	0	0	0
647	47	CHIKV	0	7	mono	1	1	0	0	0	0
648	48	CHIKV	0	7	mono	1	1	0	0	0	0
649	1	CHIKV	0	14	mono	1	1	1	0	0	0
650	2	CHIKV	0	14	mono	1	1	1	0	0	0
651	3	CHIKV	0	14	mono	1	1	1	0	0	0
652	4	CHIKV	0	14	mono	1	1	1	0	0	0
653	5	CHIKV	0	14	mono	1	1	1	0	0	0
654	6	CHIKV	0	14	mono	1	1	1	0	0	0
655	7	CHIKV	0	14	mono	1	1	1	0	0	0
656	8	CHIKV	0	14	mono	1	1	0	0	0	0
657	9	CHIKV	0	14	mono	1	1	1	0	0	0
658	10	CHIKV	0	14	mono	1	1	1	0	0	0
659	11	CHIKV	0	14	mono	1	1	1	0	0	0
660	12	CHIKV	0	14	mono	1	1	1	0	0	0
661	13	CHIKV	0	14	mono	1	1	0	0	0	0
662	14	CHIKV	0	14	mono	1	1	0	0	0	0
663	15	CHIKV	0	14	mono	1	1	1	0	0	0
664	16	CHIKV	0	14	mono	1	1	1	0	0	0
665	17	CHIKV	0	14	mono	1	1	0	0	0	0
666	18	CHIKV	0	14	mono	1	1	0	0	0	0
667	19	CHIKV	0	14	mono	1	1	1	0	0	0
668	20	CHIKV	0	14	mono	1	1	1	0	0	0
669	21	CHIKV	0	14	mono	1	1	0	0	0	0
670	22	CHIKV	0	14	mono	1	1	0	0	0	0
671	23	CHIKV	0	14	mono	1	1	0	0	0	0
672	24	CHIKV	0	14	mono	1	1	1	0	0	0
673	25	CHIKV	0	14	mono	1	1	1	0	0	0
674	26	CHIKV	0	14	mono	1	1	1	0	0	0
675	27	CHIKV	0	14	mono	1	1	0	0	0	0
676	28	CHIKV	0	14	mono	1	1	0	0	0	0
677	29	CHIKV	0	14	mono	1	1	1	0	0	0
678	30	CHIKV	0	14	mono	1	1	0	0	0	0
679	31	CHIKV	0	14	mono	1	1	1	0	0	0
680	32	CHIKV	0	14	mono	1	1	0	0	0	0
681	33	CHIKV	0	14	mono	1	1	0	0	0	0
682	34	CHIKV	0	14	mono	1	1	0	0	0	0
683	35	CHIKV	0	14	mono	1	1	1	0	0	0
684	36	CHIKV	0	14	mono	1	1	1	0	0	0
685	37	CHIKV	0	14	mono	1	1	1	0	0	0
686	38	CHIKV	0	14	mono	1	1	1	0	0	0
687	39	CHIKV	0	14	mono	1	1	0	0	0	0
688	40	CHIKV	0	14	mono	1	1	0	0	0	0
689	41	CHIKV	0	14	mono	1	1	0	0	0	0
690	42	CHIKV	0	14	mono	1	1	0	0	0	0
691	43	CHIKV	0	14	mono	1	1	1	0	0	0
692	44	CHIKV	0	14	mono	1	1	0	0	0	0
693	45	CHIKV	0	14	mono	1	1	1	0	0	0
694	46	CHIKV	0	14	mono	1	1	0	0	0	0
695	47	CHIKV	0	14	mono	1	1	1	0	0	0
696	48	CHIKV	0	14	mono	1	1	0	0	0	0
697	1	CHIKV	0	21	mono	1	1	0	0	0	0
698	2	CHIKV	0	21	mono	1	1	0	0	0	0
699	3	CHIKV	0	21	mono	1	1	0	0	0	0
700	4	CHIKV	0	21	mono	1	1	0	0	0	0
701	5	CHIKV	0	21	mono	1	1	0	0	0	0
702	6	CHIKV	0	21	mono	1	1	1	0	0	0
703	7	CHIKV	0	21	mono	1	1	0	0	0	0
704	8	CHIKV	0	21	mono	1	1	0	0	0	0
705	9	CHIKV	0	21	mono	1	1	0	0	0	0
706	10	CHIKV	0	21	mono	1	1	0	0	0	0
707	11	CHIKV	0	21	mono	1	1	1	0	0	0
708	12	CHIKV	0	21	mono	1	1	0	0	0	0
709	13	CHIKV	0	21	mono	1	1	0	0	0	0
710	14	CHIKV	0	21	mono	1	1	0	0	0	0
711	15	CHIKV	0	21	mono	1	1	0	0	0	0
712	16	CHIKV	0	21	mono	1	1	0	0	0	0
713	17	CHIKV	0	21	mono	1	1	0	0	0	0
714	18	CHIKV	0	21	mono	1	1	0	0	0	0
715	19	CHIKV	0	21	mono	1	1	0	0	0	0
716	20	CHIKV	0	21	mono	1	1	0	0	0	0
717	21	CHIKV	0	21	mono	1	1	1	0	0	0
718	22	CHIKV	0	21	mono	1	1	0	0	0	0
719	23	CHIKV	0	21	mono	1	1	1	0	0	0
720	24	CHIKV	0	21	mono	1	1	1	0	0	0
721	25	CHIKV	0	21	mono	1	1	0	0	0	0
722	26	CHIKV	0	21	mono	1	1	1	0	0	0
723	27	CHIKV	0	21	mono	1	1	0	0	0	0
724	28	CHIKV	0	21	mono	1	1	0	0	0	0
725	29	CHIKV	0	21	mono	1	1	0	0	0	0
726	30	CHIKV	0	21	mono	1	1	0	0	0	0
727	31	CHIKV	0	21	mono	1	1	0	0	0	0
728	32	CHIKV	0	21	mono	1	1	1	0	0	0
729	33	CHIKV	0	21	mono	1	1	1	0	0	0
730	34	CHIKV	0	21	mono	1	1	0	0	0	0
731	35	CHIKV	0	21	mono	1	1	0	0	0	0
732	36	CHIKV	0	21	mono	1	1	0	0	0	0
733	37	CHIKV	0	21	mono	1	1	0	0	0	0
734	38	CHIKV	0	21	mono	1	1	0	0	0	0
735	39	CHIKV	0	21	mono	1	1	1	0	0	0
736	40	CHIKV	0	21	mono	1	1	0	0	0	0
737	41	CHIKV	0	21	mono	1	1	0	0	0	0
738	42	CHIKV	0	21	mono	1	1	0	0	0	0
739	43	CHIKV	0	21	mono	1	1	0	0	0	0
740	44	CHIKV	0	21	mono	1	1	0	0	0	0
741	45	CHIKV	0	21	mono	1	1	0	0	0	0
742	46	CHIKV	0	21	mono	1	1	0	0	0	0
743	47	CHIKV	0	21	mono	1	1	0	0	0	0
744	48	CHIKV	0	21	mono	1	1	1	0	0	0
745	1	YFV	JEV	7	co	1	0	0	1	1	0
746	2	YFV	JEV	7	co	1	0	0	1	1	0
747	3	YFV	JEV	7	co	1	0	0	1	1	0
748	4	YFV	JEV	7	co	0	0	0	1	1	1
749	5	YFV	JEV	7	co	0	0	0	1	1	1
750	6	YFV	JEV	7	co	0	0	0	1	1	0
751	7	YFV	JEV	7	co	0	0	0	0	0	0
752	8	YFV	JEV	7	co	0	0	0	1	1	0
753	9	YFV	JEV	7	co	1	0	0	1	0	0
754	10	YFV	JEV	7	co	1	0	0	1	1	1
755	11	YFV	JEV	7	co	1	0	0	0	0	0
756	12	YFV	JEV	7	co	1	0	0	1	1	0
757	13	YFV	JEV	7	co	1	0	0	0	0	0
758	14	YFV	JEV	7	co	1	0	0	0	0	0
759	15	YFV	JEV	7	co	0	0	0	1	1	0
760	16	YFV	JEV	7	co	0	0	0	1	0	0
761	17	YFV	JEV	7	co	1	1	0	1	1	0
762	18	YFV	JEV	7	co	0	0	0	1	1	1
763	19	YFV	JEV	7	co	0	0	0	0	0	0
764	20	YFV	JEV	7	co	1	0	0	1	1	0
765	21	YFV	JEV	7	co	1	0	0	1	1	0
766	22	YFV	JEV	7	co	0	0	0	1	1	0
767	1	YFV	JEV	14	co	0	0	0	0	0	0
768	2	YFV	JEV	14	co	1	0	0	1	1	0
769	3	YFV	JEV	14	co	1	0	0	1	1	0
770	4	YFV	JEV	14	co	0	0	0	1	1	1
771	5	YFV	JEV	14	co	0	0	0	1	1	0
772	6	YFV	JEV	14	co	1	1	0	1	1	0
773	7	YFV	JEV	14	co	1	0	0	1	1	1
774	8	YFV	JEV	14	co	0	0	0	1	1	1
775	9	YFV	JEV	14	co	1	0	0	1	1	1
776	10	YFV	JEV	14	co	0	0	0	1	1	1
777	11	YFV	JEV	14	co	1	0	0	1	1	0
778	12	YFV	JEV	14	co	1	0	0	1	1	0
779	13	YFV	JEV	14	co	1	0	0	1	1	0
780	14	YFV	JEV	14	co	1	1	0	1	1	1
781	15	YFV	JEV	14	co	1	0	0	1	1	0
782	16	YFV	JEV	14	co	0	0	0	1	0	0
783	17	YFV	JEV	14	co	0	0	0	1	1	0
784	18	YFV	JEV	14	co	0	0	0	1	1	0
785	19	YFV	JEV	14	co	0	0	0	1	1	0
786	20	YFV	JEV	14	co	1	1	0	1	1	1
787	21	YFV	JEV	14	co	1	0	0	1	1	0
788	22	YFV	JEV	14	co	1	0	0	1	1	1
789	23	YFV	JEV	14	co	1	1	1	1	1	0
790	24	YFV	JEV	14	co	1	0	0	1	1	1
791	1	YFV	JEV	21	co	1	1	0	1	1	0
792	2	YFV	JEV	21	co	1	0	0	1	1	0
793	3	YFV	JEV	21	co	1	1	0	1	1	1
794	4	YFV	JEV	21	co	1	1	0	1	1	1
795	5	YFV	JEV	21	co	0	0	0	0	0	0
796	6	YFV	JEV	21	co	0	0	0	1	1	0
797	7	YFV	JEV	21	co	1	0	0	1	1	0
798	8	YFV	JEV	21	co	0	0	0	1	0	0
799	9	YFV	JEV	21	co	1	1	0	1	1	1
800	10	YFV	JEV	21	co	1	0	0	1	1	1
801	11	YFV	JEV	21	co	1	0	0	1	1	0
802	12	YFV	JEV	21	co	1	1	0	1	1	1
803	13	YFV	JEV	21	co	1	0	0	1	1	1
804	14	YFV	JEV	21	co	1	0	0	1	1	0
805	15	YFV	JEV	21	co	0	0	0	1	1	0
806	16	YFV	JEV	21	co	1	0	0	1	1	1
807	17	YFV	JEV	21	co	1	1	0	1	1	0
808	18	YFV	JEV	21	co	1	0	0	1	1	1
809	19	YFV	JEV	21	co	1	1	0	1	1	1
810	20	YFV	JEV	21	co	1	1	0	1	1	1
811	21	YFV	JEV	21	co	1	0	0	1	1	1
812	22	YFV	JEV	21	co	1	1	1	1	0	0
813	23	YFV	JEV	21	co	1	0	0	1	1	1
814	1	DENV	YFV	7	co	1	1	0	1	1	0
815	2	DENV	YFV	7	co	1	0	0	1	0	0
816	3	DENV	YFV	7	co	1	0	0	1	1	0
817	4	DENV	YFV	7	co	1	0	0	1	0	0
818	5	DENV	YFV	7	co	1	1	0	1	1	0
819	6	DENV	YFV	7	co	1	0	0	1	0	0
820	7	DENV	YFV	7	co	1	1	0	1	0	0
821	8	DENV	YFV	7	co	0	0	0	1	1	0
822	9	DENV	YFV	7	co	1	1	0	1	1	0
823	10	DENV	YFV	7	co	1	1	0	1	1	0
824	11	DENV	YFV	7	co	1	0	0	1	0	0
825	12	DENV	YFV	7	co	1	1	0	1	0	0
826	13	DENV	YFV	7	co	1	0	0	1	1	0
827	14	DENV	YFV	7	co	0	0	0	0	0	0
828	15	DENV	YFV	7	co	1	0	0	1	1	0
829	16	DENV	YFV	7	co	1	1	0	1	1	0
830	17	DENV	YFV	7	co	1	0	0	1	0	0
831	18	DENV	YFV	7	co	1	0	0	1	1	0
832	19	DENV	YFV	7	co	1	1	0	1	1	0
833	20	DENV	YFV	7	co	1	0	0	1	1	0
834	21	DENV	YFV	7	co	1	1	0	1	1	0
835	22	DENV	YFV	7	co	1	1	0	1	1	0
836	23	DENV	YFV	7	co	1	1	0	1	0	0
837	1	DENV	YFV	14	co	1	1	0	1	0	0
838	2	DENV	YFV	14	co	1	1	1	1	0	0
839	3	DENV	YFV	14	co	1	1	0	1	0	0
840	4	DENV	YFV	14	co	1	1	0	1	1	0
841	5	DENV	YFV	14	co	1	1	0	1	1	0
842	6	DENV	YFV	14	co	1	0	0	1	1	1
843	7	DENV	YFV	14	co	1	1	0	1	0	0
844	8	DENV	YFV	14	co	1	1	0	1	1	0
845	9	DENV	YFV	14	co	1	0	0	1	1	0
846	10	DENV	YFV	14	co	1	0	0	1	1	0
847	11	DENV	YFV	14	co	1	1	0	1	0	0
848	12	DENV	YFV	14	co	1	0	0	1	1	0
849	13	DENV	YFV	14	co	1	1	1	1	1	0
850	14	DENV	YFV	14	co	1	1	0	1	1	0
851	15	DENV	YFV	14	co	1	1	0	1	0	0
852	16	DENV	YFV	14	co	1	1	1	1	1	0
853	17	DENV	YFV	14	co	1	1	0	1	1	0
854	18	DENV	YFV	14	co	1	1	0	1	1	0
855	19	DENV	YFV	14	co	1	1	0	1	1	0
856	20	DENV	YFV	14	co	1	1	0	1	0	0
857	21	DENV	YFV	14	co	1	1	0	1	0	0
858	22	DENV	YFV	14	co	1	1	0	1	1	0
859	1	DENV	YFV	21	co	1	1	1	1	1	0
860	2	DENV	YFV	21	co	1	1	0	1	0	0
861	3	DENV	YFV	21	co	1	1	1	1	1	0
862	4	DENV	YFV	21	co	1	1	1	1	1	0
863	5	DENV	YFV	21	co	1	1	1	1	1	0
864	6	DENV	YFV	21	co	1	1	1	1	1	1
865	7	DENV	YFV	21	co	0	0	0	1	1	0
866	8	DENV	YFV	21	co	1	1	1	1	1	0
867	9	DENV	YFV	21	co	1	1	0	1	1	0
868	10	DENV	YFV	21	co	1	1	0	1	1	0
869	11	DENV	YFV	21	co	1	1	1	1	1	0
870	12	DENV	YFV	21	co	1	1	0	1	1	1
871	13	DENV	YFV	21	co	1	0	0	1	1	0
872	14	DENV	YFV	21	co	1	1	1	1	1	1
873	15	DENV	YFV	21	co	1	1	0	1	1	0
874	16	DENV	YFV	21	co	1	1	0	1	1	0
875	17	DENV	YFV	21	co	1	1	1	1	1	0
876	18	DENV	YFV	21	co	1	1	1	1	1	0
877	19	DENV	YFV	21	co	1	1	0	1	1	0
878	20	DENV	YFV	21	co	1	1	1	1	1	0
879	21	DENV	YFV	21	co	1	1	1	1	1	1
880	22	DENV	YFV	21	co	1	1	1	1	1	0
881	1	DENV	JEV	7	co	1	0	0	1	1	0
882	2	DENV	JEV	7	co	1	0	0	1	0	0
883	3	DENV	JEV	7	co	1	0	0	1	1	0
884	4	DENV	JEV	7	co	1	1	0	1	1	0
885	5	DENV	JEV	7	co	1	1	0	1	1	0
886	6	DENV	JEV	7	co	0	0	0	1	1	0
887	7	DENV	JEV	7	co	0	0	0	1	0	0
888	8	DENV	JEV	7	co	1	1	0	0	0	0
889	9	DENV	JEV	7	co	1	1	0	1	0	0
890	10	DENV	JEV	7	co	1	1	0	1	1	0
891	11	DENV	JEV	7	co	1	0	0	1	0	0
892	12	DENV	JEV	7	co	1	1	1	1	0	0
893	13	DENV	JEV	7	co	0	0	0	0	0	0
894	14	DENV	JEV	7	co	1	0	0	0	0	0
895	15	DENV	JEV	7	co	1	1	0	0	0	0
896	16	DENV	JEV	7	co	1	1	0	1	1	0
897	17	DENV	JEV	7	co	1	0	0	1	0	0
898	18	DENV	JEV	7	co	1	1	0	1	1	1
899	19	DENV	JEV	7	co	1	1	0	1	1	0
900	20	DENV	JEV	7	co	1	1	0	1	1	0
901	21	DENV	JEV	7	co	1	1	0	0	0	0
902	22	DENV	JEV	7	co	0	0	0	0	0	0
903	1	DENV	JEV	14	co	1	1	0	1	1	0
904	2	DENV	JEV	14	co	1	1	0	1	1	0
905	3	DENV	JEV	14	co	1	1	0	1	1	1
906	4	DENV	JEV	14	co	1	1	1	0	0	0
907	5	DENV	JEV	14	co	1	1	0	1	1	0
908	6	DENV	JEV	14	co	1	0	0	1	0	0
909	7	DENV	JEV	14	co	1	1	0	0	0	0
910	8	DENV	JEV	14	co	1	1	0	0	0	0
911	9	DENV	JEV	14	co	1	1	0	1	0	0
912	10	DENV	JEV	14	co	1	1	0	1	1	0
913	11	DENV	JEV	14	co	1	1	0	1	1	0
914	12	DENV	JEV	14	co	1	1	0	1	1	0
915	13	DENV	JEV	14	co	1	0	0	1	1	1
916	14	DENV	JEV	14	co	1	1	0	1	1	1
917	15	DENV	JEV	14	co	1	1	0	1	1	0
918	16	DENV	JEV	14	co	1	1	0	1	0	0
919	17	DENV	JEV	14	co	1	1	0	1	1	1
920	18	DENV	JEV	14	co	0	0	0	1	1	0
921	19	DENV	JEV	14	co	1	0	0	1	1	0
922	20	DENV	JEV	14	co	1	1	0	1	1	0
923	21	DENV	JEV	14	co	1	1	0	1	1	0
924	22	DENV	JEV	14	co	1	1	0	1	1	0
925	23	DENV	JEV	14	co	1	1	0	1	1	1
926	1	DENV	JEV	21	co	1	1	0	1	0	0
927	2	DENV	JEV	21	co	1	1	1	1	1	0
928	3	DENV	JEV	21	co	1	1	0	0	0	0
929	4	DENV	JEV	21	co	0	0	0	0	0	0
930	5	DENV	JEV	21	co	1	1	1	0	0	0
931	6	DENV	JEV	21	co	1	1	0	0	0	0
932	7	DENV	JEV	21	co	1	1	0	0	0	0
933	8	DENV	JEV	21	co	1	1	0	1	1	1
934	9	DENV	JEV	21	co	0	0	0	1	1	0
935	10	DENV	JEV	21	co	1	1	0	1	1	0
936	11	DENV	JEV	21	co	1	1	1	1	1	1
937	12	DENV	JEV	21	co	1	1	1	1	1	1
938	13	DENV	JEV	21	co	0	0	0	1	1	0
939	14	DENV	JEV	21	co	1	1	0	1	1	1
940	15	DENV	JEV	21	co	1	1	0	1	1	1
941	16	DENV	JEV	21	co	1	1	0	1	1	1
942	17	DENV	JEV	21	co	1	1	0	1	1	0
943	18	DENV	JEV	21	co	1	1	0	1	1	1
944	19	DENV	JEV	21	co	1	1	0	1	1	1
945	20	DENV	JEV	21	co	1	1	1	1	1	1
946	21	DENV	JEV	21	co	1	1	0	1	1	0
947	22	DENV	JEV	21	co	1	1	0	1	1	1
948	1	JEV	YFV	7	super	1	1	1	1	0	0
949	2	JEV	YFV	7	super	1	1	1	1	0	0
950	3	JEV	YFV	7	super	1	0	0	1	1	0
951	4	JEV	YFV	7	super	1	1	1	1	1	0
952	5	JEV	YFV	7	super	1	1	0	1	0	0
953	6	JEV	YFV	7	super	1	1	1	1	1	0
954	7	JEV	YFV	7	super	1	1	1	1	0	0
955	8	JEV	YFV	7	super	1	1	0	1	1	0
956	9	JEV	YFV	7	super	1	1	0	1	0	0
957	10	JEV	YFV	7	super	1	1	1	1	1	0
958	11	JEV	YFV	7	super	1	0	0	1	1	0
959	12	JEV	YFV	7	super	1	1	1	0	0	0
960	13	JEV	YFV	7	super	1	0	0	1	1	0
961	14	JEV	YFV	7	super	1	1	1	1	0	0
962	15	JEV	YFV	7	super	1	0	0	1	1	0
963	16	JEV	YFV	7	super	1	1	1	1	0	0
964	17	JEV	YFV	7	super	1	1	0	1	1	0
965	18	JEV	YFV	7	super	1	1	0	1	0	0
966	19	JEV	YFV	7	super	1	1	0	1	0	0
967	20	JEV	YFV	7	super	1	1	0	0	0	0
968	21	JEV	YFV	7	super	1	1	0	1	1	0
969	22	JEV	YFV	7	super	1	1	0	1	0	0
970	23	JEV	YFV	7	super	1	1	0	1	1	0
971	1	JEV	YFV	14	super	1	1	0	0	0	0
972	2	JEV	YFV	14	super	1	1	0	1	0	0
973	3	JEV	YFV	14	super	1	1	0	1	0	0
974	4	JEV	YFV	14	super	1	1	0	1	0	0
975	5	JEV	YFV	14	super	1	1	0	1	1	0
976	6	JEV	YFV	14	super	1	1	0	1	0	0
977	7	JEV	YFV	14	super	1	1	0	1	0	0
978	8	JEV	YFV	14	super	1	1	0	1	0	0
979	9	JEV	YFV	14	super	1	1	1	1	0	0
980	10	JEV	YFV	14	super	1	1	0	1	0	0
981	11	JEV	YFV	14	super	1	1	0	1	0	0
982	12	JEV	YFV	14	super	1	1	0	1	0	0
983	13	JEV	YFV	14	super	1	1	0	0	0	0
984	14	JEV	YFV	14	super	1	1	1	1	1	0
985	15	JEV	YFV	14	super	1	1	0	0	0	0
986	16	JEV	YFV	14	super	1	1	0	1	1	0
987	17	JEV	YFV	14	super	1	1	0	0	0	0
988	18	JEV	YFV	14	super	0	0	0	0	0	0
989	19	JEV	YFV	14	super	1	1	0	1	0	0
990	20	JEV	YFV	14	super	1	0	0	1	0	0
991	21	JEV	YFV	14	super	1	1	0	1	0	0
992	22	JEV	YFV	14	super	0	0	0	0	0	0
993	23	JEV	YFV	14	super	1	1	0	1	0	0
994	1	YFV	JEV	7	super	1	1	1	1	1	0
995	2	YFV	JEV	7	super	1	1	0	0	0	0
996	3	YFV	JEV	7	super	1	1	1	1	0	0
997	4	YFV	JEV	7	super	1	1	1	1	0	0
998	5	YFV	JEV	7	super	1	1	1	1	0	0
999	6	YFV	JEV	7	super	1	1	1	0	0	0
1000	7	YFV	JEV	7	super	1	1	1	0	0	0
1001	8	YFV	JEV	7	super	1	1	1	0	0	0
1002	9	YFV	JEV	7	super	1	1	1	0	0	0
1003	10	YFV	JEV	7	super	1	1	1	0	0	0
1004	11	YFV	JEV	7	super	1	1	1	1	1	0
1005	12	YFV	JEV	7	super	1	1	1	1	0	0
1006	13	YFV	JEV	7	super	1	1	1	0	0	0
1007	14	YFV	JEV	7	super	1	1	1	1	0	0
1008	15	YFV	JEV	7	super	1	1	0	0	0	0
1009	16	YFV	JEV	7	super	1	1	0	0	0	0
1010	17	YFV	JEV	7	super	1	1	1	0	0	0
1011	18	YFV	JEV	7	super	1	1	1	1	1	1
1012	19	YFV	JEV	7	super	1	1	1	0	0	0
1013	20	YFV	JEV	7	super	1	1	1	1	1	0
1014	21	YFV	JEV	7	super	1	1	0	0	0	0
1015	22	YFV	JEV	7	super	1	1	1	1	0	0
1016	23	YFV	JEV	7	super	1	1	0	1	1	1
1017	24	YFV	JEV	7	super	1	1	1	1	1	0
1018	1	YFV	JEV	14	super	1	1	1	0	0	0
1019	2	YFV	JEV	14	super	1	1	1	1	1	0
1020	3	YFV	JEV	14	super	1	1	1	1	0	0
1021	4	YFV	JEV	14	super	1	1	0	0	0	0
1022	5	YFV	JEV	14	super	1	1	0	1	0	0
1023	6	YFV	JEV	14	super	1	1	0	0	0	0
1024	7	YFV	JEV	14	super	1	1	0	0	0	0
1025	8	YFV	JEV	14	super	1	1	1	0	0	0
1026	9	YFV	JEV	14	super	1	1	1	0	0	0
1027	10	YFV	JEV	14	super	1	1	0	0	0	0
1028	11	YFV	JEV	14	super	1	1	0	1	1	0
1029	12	YFV	JEV	14	super	1	1	1	0	0	0
1030	13	YFV	JEV	14	super	1	1	1	0	0	0
1031	14	YFV	JEV	14	super	1	1	0	1	0	0
1032	15	YFV	JEV	14	super	1	1	1	0	0	0
1033	16	YFV	JEV	14	super	1	1	1	0	0	0
1034	17	YFV	JEV	14	super	1	1	0	0	0	0
1035	18	YFV	JEV	14	super	1	1	1	0	0	0
1036	19	YFV	JEV	14	super	1	1	0	0	0	0
1037	20	YFV	JEV	14	super	1	1	1	0	0	0
1038	21	YFV	JEV	14	super	1	1	1	0	0	0
1039	22	YFV	JEV	14	super	1	1	1	0	0	0
1040	1	JEV	CHIKV	7	super	1	0	0	1	0	0
1041	2	JEV	CHIKV	7	super	1	1	0	1	1	0
1042	3	JEV	CHIKV	7	super	1	1	1	1	1	0
1043	4	JEV	CHIKV	7	super	1	1	1	1	1	0
1044	5	JEV	CHIKV	7	super	1	1	1	1	1	0
1045	6	JEV	CHIKV	7	super	1	0	0	1	0	0
1046	7	JEV	CHIKV	7	super	1	1	0	1	1	0
1047	8	JEV	CHIKV	7	super	1	1	1	1	1	0
1048	9	JEV	CHIKV	7	super	1	1	1	1	1	0
1049	10	JEV	CHIKV	7	super	1	1	0	1	1	0
1050	11	JEV	CHIKV	7	super	1	1	0	1	1	0
1051	12	JEV	CHIKV	7	super	1	1	1	1	1	0
1052	13	JEV	CHIKV	7	super	1	1	1	1	1	0
1053	14	JEV	CHIKV	7	super	1	1	1	1	1	0
1054	15	JEV	CHIKV	7	super	1	1	1	1	1	0
1055	16	JEV	CHIKV	7	super	1	1	1	1	1	0
1056	17	JEV	CHIKV	7	super	1	1	0	1	0	0
1057	18	JEV	CHIKV	7	super	1	1	0	1	1	0
1058	19	JEV	CHIKV	7	super	1	1	1	1	1	0
1059	20	JEV	CHIKV	7	super	1	1	0	1	1	1
1060	21	JEV	CHIKV	7	super	1	1	1	1	1	0
1061	22	JEV	CHIKV	7	super	1	1	0	1	1	0
1062	23	JEV	CHIKV	7	super	1	1	1	1	1	0
1063	24	JEV	CHIKV	7	super	1	1	0	1	1	0
1064	1	JEV	CHIKV	14	super	1	1	1	1	1	0
1065	2	JEV	CHIKV	14	super	1	1	1	1	1	0
1066	3	JEV	CHIKV	14	super	1	1	1	1	1	0
1067	4	JEV	CHIKV	14	super	1	1	1	1	1	0
1068	5	JEV	CHIKV	14	super	1	1	1	1	1	1
1069	6	JEV	CHIKV	14	super	1	1	0	1	1	0
1070	7	JEV	CHIKV	14	super	1	1	1	1	1	0
1071	8	JEV	CHIKV	14	super	1	1	1	1	1	0
1072	9	JEV	CHIKV	14	super	1	1	1	1	1	0
1073	10	JEV	CHIKV	14	super	1	1	0	1	1	0
1074	11	JEV	CHIKV	14	super	1	1	0	1	1	0
1075	12	JEV	CHIKV	14	super	1	1	1	1	1	1
1076	13	JEV	CHIKV	14	super	1	1	0	1	1	1
1077	14	JEV	CHIKV	14	super	1	1	1	1	1	1
1078	15	JEV	CHIKV	14	super	1	1	1	1	1	0
1079	16	JEV	CHIKV	14	super	1	1	1	1	1	0
1080	17	JEV	CHIKV	14	super	1	1	1	1	1	0
1081	18	JEV	CHIKV	14	super	1	1	1	1	1	1
1082	19	JEV	CHIKV	14	super	1	1	1	1	1	0
1083	20	JEV	CHIKV	14	super	1	1	1	1	1	0
1084	21	JEV	CHIKV	14	super	1	1	1	1	1	0
1085	22	JEV	CHIKV	14	super	1	1	0	1	1	0
1086	23	JEV	CHIKV	14	super	1	1	1	1	1	0
1087	1	DENV	YFV	7	super	1	1	1	1	0	0
1088	2	DENV	YFV	7	super	1	1	0	1	0	0
1089	3	DENV	YFV	7	super	1	1	1	1	0	0
1090	4	DENV	YFV	7	super	1	1	0	0	0	0
1091	5	DENV	YFV	7	super	1	1	0	0	0	0
1092	6	DENV	YFV	7	super	1	1	1	0	0	0
1093	7	DENV	YFV	7	super	1	1	1	1	0	0
1094	8	DENV	YFV	7	super	1	1	0	1	0	0
1095	9	DENV	YFV	7	super	1	1	1	0	0	0
1096	10	DENV	YFV	7	super	1	1	1	0	0	0
1097	11	DENV	YFV	7	super	1	1	1	0	0	0
1098	12	DENV	YFV	7	super	1	1	0	0	0	0
1099	13	DENV	YFV	7	super	1	1	1	1	0	0
1100	14	DENV	YFV	7	super	1	1	1	1	1	0
1101	15	DENV	YFV	7	super	1	1	1	0	0	0
1102	16	DENV	YFV	7	super	1	1	1	1	0	0
1103	17	DENV	YFV	7	super	1	1	1	1	1	0
1104	18	DENV	YFV	7	super	1	1	1	0	0	0
1105	19	DENV	YFV	7	super	1	1	1	0	0	0
1106	20	DENV	YFV	7	super	1	1	1	1	0	0
1107	21	DENV	YFV	7	super	1	1	0	0	0	0
1108	22	DENV	YFV	7	super	1	1	1	0	0	0
1109	23	DENV	YFV	7	super	1	1	1	1	0	0
1110	1	DENV	YFV	14	super	1	1	0	1	0	0
1111	2	DENV	YFV	14	super	1	1	1	0	0	0
1112	3	DENV	YFV	14	super	1	1	1	1	0	0
1113	4	DENV	YFV	14	super	1	1	0	1	0	0
1114	5	DENV	YFV	14	super	1	1	1	0	0	0
1115	6	DENV	YFV	14	super	1	1	1	1	0	0
1116	7	DENV	YFV	14	super	1	1	1	0	0	0
1117	8	DENV	YFV	14	super	1	1	1	0	0	0
1118	9	DENV	YFV	14	super	1	1	1	0	0	0
1119	10	DENV	YFV	14	super	1	1	0	1	0	0
1120	11	DENV	YFV	14	super	1	1	1	1	0	0
1121	12	DENV	YFV	14	super	1	1	1	0	0	0
1122	13	DENV	YFV	14	super	1	1	1	0	0	0
1123	14	DENV	YFV	14	super	1	1	1	0	0	0
1124	15	DENV	YFV	14	super	1	1	1	0	0	0
1125	16	DENV	YFV	14	super	1	1	1	0	0	0
1126	17	DENV	YFV	14	super	1	1	1	1	0	0
1127	18	DENV	YFV	14	super	1	1	1	1	0	0
1128	19	DENV	YFV	14	super	1	1	0	0	0	0
1129	20	DENV	YFV	14	super	1	1	1	0	0	0
1130	21	DENV	YFV	14	super	1	1	0	0	0	0
1131	22	DENV	YFV	14	super	1	1	0	1	0	0
1132	23	DENV	YFV	14	super	1	1	1	1	0	0
1133	24	DENV	YFV	14	super	1	1	1	1	0	0
1134	1	YFV	DENV	7	super	1	1	0	1	0	0
1135	2	YFV	DENV	7	super	1	0	0	1	1	1
1136	3	YFV	DENV	7	super	1	1	0	1	0	0
1137	4	YFV	DENV	7	super	1	1	0	1	0	0
1138	5	YFV	DENV	7	super	1	1	0	1	0	0
1139	6	YFV	DENV	7	super	1	1	1	1	0	0
1140	7	YFV	DENV	7	super	1	1	0	1	1	1
1141	8	YFV	DENV	7	super	1	1	1	1	0	0
1142	9	YFV	DENV	7	super	1	1	1	0	0	0
1143	10	YFV	DENV	7	super	1	1	1	1	0	0
1144	11	YFV	DENV	7	super	1	1	1	1	0	0
1145	12	YFV	DENV	7	super	1	1	0	1	0	0
1146	13	YFV	DENV	7	super	1	1	0	0	0	0
1147	14	YFV	DENV	7	super	1	1	1	1	0	0
1148	15	YFV	DENV	7	super	1	1	0	1	0	0
1149	16	YFV	DENV	7	super	1	1	1	1	0	0
1150	17	YFV	DENV	7	super	1	1	1	0	0	0
1151	18	YFV	DENV	7	super	1	1	1	1	1	1
1152	19	YFV	DENV	7	super	1	1	0	0	0	0
1153	20	YFV	DENV	7	super	1	1	0	1	1	0
1154	21	YFV	DENV	7	super	1	1	1	1	0	0
1155	22	YFV	DENV	7	super	1	0	0	1	1	0
1156	23	YFV	DENV	7	super	0	0	0	1	1	1
1157	24	YFV	DENV	7	super	1	1	0	0	0	0
1158	1	YFV	DENV	14	super	1	1	0	0	0	0
1159	2	YFV	DENV	14	super	1	1	1	0	0	0
1160	3	YFV	DENV	14	super	1	1	0	0	0	0
1161	4	YFV	DENV	14	super	1	1	1	0	0	0
1162	5	YFV	DENV	14	super	1	1	0	0	0	0
1163	6	YFV	DENV	14	super	1	1	0	1	0	0
1164	7	YFV	DENV	14	super	1	1	0	1	1	0
1165	8	YFV	DENV	14	super	1	1	0	0	0	0
1166	9	YFV	DENV	14	super	1	1	0	0	0	0
1167	10	YFV	DENV	14	super	1	1	1	0	0	0
1168	11	YFV	DENV	14	super	1	1	1	0	0	0
1169	12	YFV	DENV	14	super	1	1	0	0	0	0
1170	13	YFV	DENV	14	super	1	1	1	0	0	0
1171	14	YFV	DENV	14	super	1	1	1	1	0	0
1172	15	YFV	DENV	14	super	1	1	1	0	0	0
1173	16	YFV	DENV	14	super	1	1	1	0	0	0
1174	17	YFV	DENV	14	super	1	1	0	0	0	0
1175	18	YFV	DENV	14	super	1	1	1	0	0	0
1176	19	YFV	DENV	14	super	1	1	1	0	0	0
1177	20	YFV	DENV	14	super	1	1	1	1	0	0
1178	21	YFV	DENV	14	super	1	1	1	0	0	0
1179	22	YFV	DENV	14	super	1	1	0	0	0	0
1180	23	YFV	DENV	14	super	1	1	1	0	0	0
1181	24	YFV	DENV	14	super	1	1	0	0	0	0
1182	1	JEV	DENV	7	super	1	1	1	1	0	0
1183	2	JEV	DENV	7	super	1	1	1	1	1	0
1184	3	JEV	DENV	7	super	1	1	1	1	1	0
1185	4	JEV	DENV	7	super	1	1	1	1	1	0
1186	5	JEV	DENV	7	super	1	0	0	1	1	1
1187	6	JEV	DENV	7	super	1	1	1	1	1	0
1188	7	JEV	DENV	7	super	1	0	0	1	1	0
1189	8	JEV	DENV	7	super	1	1	1	1	1	0
1190	9	JEV	DENV	7	super	1	1	0	1	0	0
1191	10	JEV	DENV	7	super	1	1	1	1	1	0
1192	11	JEV	DENV	7	super	1	1	1	1	1	0
1193	12	JEV	DENV	7	super	1	1	1	1	1	0
1194	13	JEV	DENV	7	super	1	1	1	1	1	0
1195	14	JEV	DENV	7	super	1	1	1	1	1	0
1196	15	JEV	DENV	7	super	1	1	0	1	1	1
1197	16	JEV	DENV	7	super	1	1	1	0	0	0
1198	17	JEV	DENV	7	super	1	1	1	0	0	0
1199	18	JEV	DENV	7	super	1	1	1	1	1	0
1200	19	JEV	DENV	7	super	1	1	0	1	1	0
1201	20	JEV	DENV	7	super	1	1	1	1	1	0
1202	21	JEV	DENV	7	super	1	1	1	1	1	0
1203	22	JEV	DENV	7	super	1	1	0	1	1	0
1204	23	JEV	DENV	7	super	1	1	0	1	1	0
1205	24	JEV	DENV	7	super	1	1	0	0	0	0
1206	1	JEV	DENV	14	super	1	1	1	1	0	0
1207	2	JEV	DENV	14	super	1	1	1	0	0	0
1208	3	JEV	DENV	14	super	1	1	0	0	0	0
1209	4	JEV	DENV	14	super	1	1	1	1	1	0
1210	5	JEV	DENV	14	super	1	1	0	0	0	0
1211	6	JEV	DENV	14	super	1	1	1	0	0	0
1212	7	JEV	DENV	14	super	1	1	1	1	0	0
1213	8	JEV	DENV	14	super	1	1	1	0	0	0
1214	9	JEV	DENV	14	super	1	1	0	0	0	0
1215	10	JEV	DENV	14	super	1	1	1	0	0	0
1216	11	JEV	DENV	14	super	1	1	1	1	1	0
1217	12	JEV	DENV	14	super	1	1	1	0	0	0
1218	13	JEV	DENV	14	super	1	1	1	0	0	0
1219	14	JEV	DENV	14	super	1	1	0	0	0	0
1220	15	JEV	DENV	14	super	1	1	1	1	0	0
1221	16	JEV	DENV	14	super	1	1	0	1	0	0
1222	17	JEV	DENV	14	super	1	1	1	0	0	0
1223	18	JEV	DENV	14	super	1	1	1	1	0	0
1224	19	JEV	DENV	14	super	1	1	1	0	0	0
1225	20	JEV	DENV	14	super	1	1	1	0	0	0
1226	21	JEV	DENV	14	super	1	1	1	0	0	0
1227	22	JEV	DENV	14	super	1	1	1	0	0	0
1228	1	DENV	JEV	7	super	1	1	0	0	0	0
1229	2	DENV	JEV	7	super	1	1	0	0	0	0
1230	3	DENV	JEV	7	super	1	1	1	1	0	0
1231	4	DENV	JEV	7	super	1	1	0	0	0	0
1232	5	DENV	JEV	7	super	1	1	1	1	1	0
1233	6	DENV	JEV	7	super	1	1	0	1	0	0
1234	7	DENV	JEV	7	super	1	1	1	1	0	0
1235	8	DENV	JEV	7	super	1	1	0	0	0	0
1236	9	DENV	JEV	7	super	1	1	1	1	0	0
1237	10	DENV	JEV	7	super	1	1	1	1	0	0
1238	11	DENV	JEV	7	super	1	1	1	0	0	0
1239	12	DENV	JEV	7	super	1	1	1	1	1	0
1240	13	DENV	JEV	7	super	1	1	1	1	0	0
1241	14	DENV	JEV	7	super	1	1	0	1	0	0
1242	15	DENV	JEV	7	super	1	1	0	1	0	0
1243	16	DENV	JEV	7	super	1	1	1	0	0	0
1244	17	DENV	JEV	7	super	1	1	1	1	1	1
1245	18	DENV	JEV	7	super	1	1	0	1	0	0
1246	19	DENV	JEV	7	super	1	1	0	1	0	0
1247	20	DENV	JEV	7	super	1	1	0	0	0	0
1248	21	DENV	JEV	7	super	1	1	0	1	0	0
1249	22	DENV	JEV	7	super	1	1	1	0	0	0
1250	23	DENV	JEV	7	super	1	1	0	1	1	0
1251	24	DENV	JEV	7	super	1	1	1	0	0	0
1252	1	DENV	JEV	14	super	1	1	0	0	0	0
1253	2	DENV	JEV	14	super	1	1	1	1	1	0
1254	3	DENV	JEV	14	super	1	1	1	1	0	0
1255	4	DENV	JEV	14	super	1	1	0	1	0	0
1256	5	DENV	JEV	14	super	1	1	0	1	0	0
1257	6	DENV	JEV	14	super	1	1	0	1	1	0
1258	7	DENV	JEV	14	super	1	1	1	1	0	0
1259	8	DENV	JEV	14	super	1	1	1	1	0	0
1260	9	DENV	JEV	14	super	1	1	0	1	0	0
1261	10	DENV	JEV	14	super	1	1	0	1	0	0
1262	11	DENV	JEV	14	super	1	1	1	1	0	0
1263	12	DENV	JEV	14	super	1	1	0	1	1	0
1264	13	DENV	JEV	14	super	1	1	0	1	1	0
1265	14	DENV	JEV	14	super	1	1	0	1	0	0
1266	15	DENV	JEV	14	super	1	1	1	0	0	0
1267	16	DENV	JEV	14	super	1	1	0	1	1	0
1268	17	DENV	JEV	14	super	1	1	0	1	1	0
1269	18	DENV	JEV	14	super	1	1	1	1	1	0
1270	19	DENV	JEV	14	super	1	1	0	1	1	0
1271	20	DENV	JEV	14	super	1	1	1	1	0	0
1272	21	DENV	JEV	14	super	1	1	0	1	0	0
1273	22	DENV	JEV	14	super	1	1	0	0	0	0
1274	23	DENV	JEV	14	super	1	1	0	0	0	0
1275	24	DENV	JEV	14	super	1	1	0	0	0	0
